# Supplementary material for: Dominant contribution of Asgard archaea to eukaryogenesis
Source: Research Square preprint supplement (doi:10.21203/rs.3.rs-5352492/v1), 2024-10-31
Supplement: Supplementary file 1 [file 4cc22413bdab36cd5ed2faae.pdf]

Extended Data

Taxonomic distribution for initial sequence databases

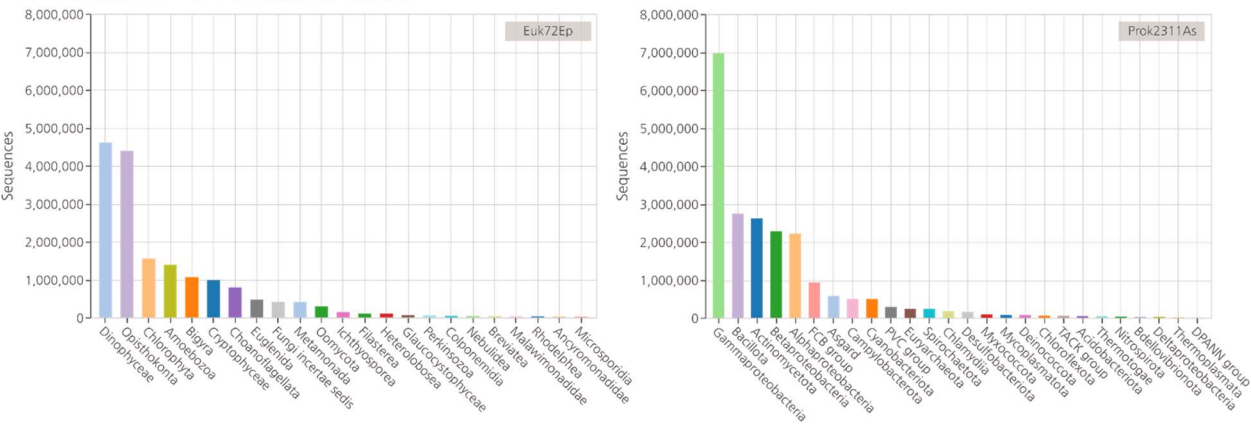

Cascaded cluster profile sizes

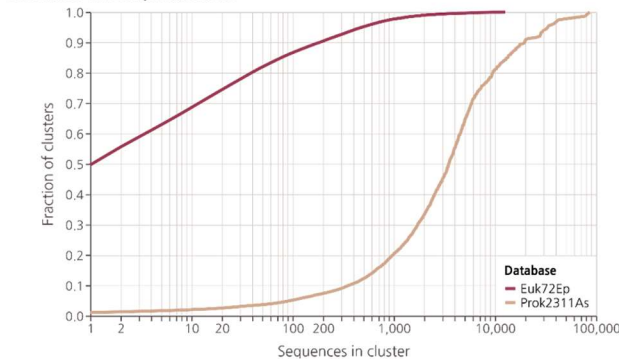

Distribution of Neff

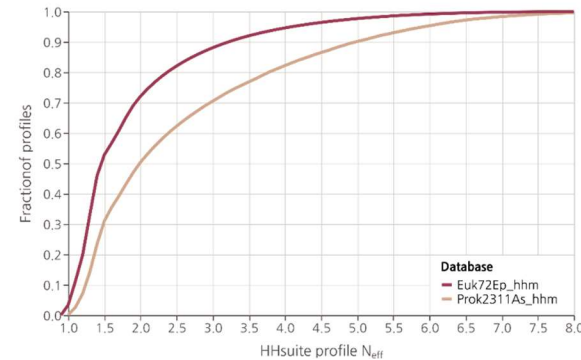

**Extended Data Figure 1. Global database statistics.** Distribution of taxonomic labels present within Euk72Ep and Prok2111As. Final cluster size distribution following cascaded mmseqs profile/sequence clustering. Distribution of  $N_{eff}$  values for resulting profile databases.

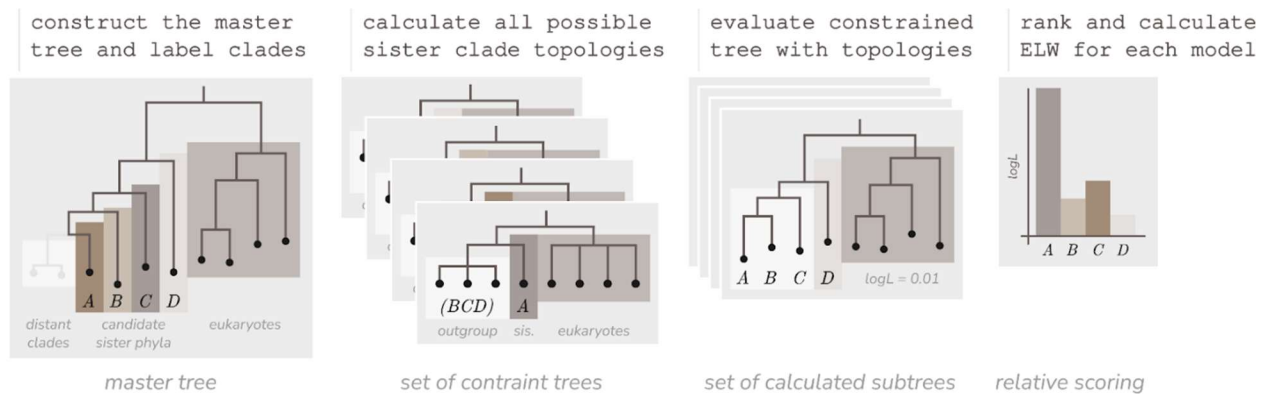

**Extended Data Figure 2. Evolutionary hypothesis testing constraint trees and Expected Likelihood Weights.** Overview of ELW calculation procedure. One master tree is constructed from all sequences within a EPOC and the closest n sister clades to the eukaryotic outgroup identified. A set of constraint trees are generated, each enforcing three clades, one eukaryotic, one sample sister and one outgroup with remaining prokaryotic sequences, is present. The set of subtrees are then constructed, each forced to conform to a single guide tree. LogLikelihood values for resulting trees are compared and evaluated using IQtree -z to produce confidence sets and Expected Likelihood Weight estimations.

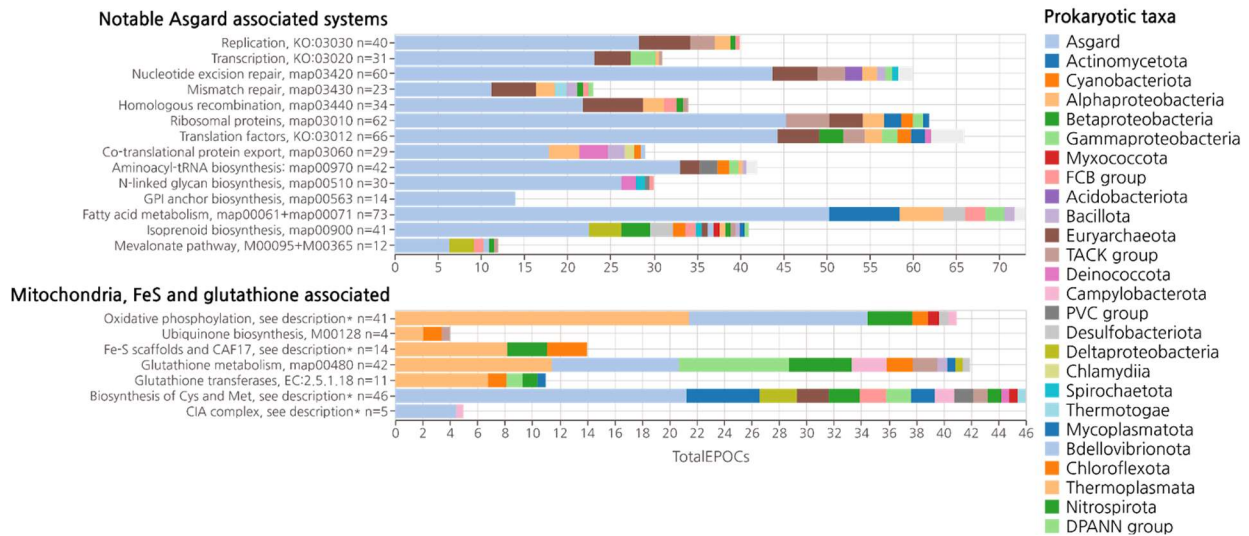

**Extended Data Figure 3. ELW breakdown of additional maps and pathways with prominent Asgard and Alphaproteobacterial contributions.** Average ELW for all EPOCs within relevant pathways. Averages of KOG sets annotated by map number (ex map0000X), module number (ex. M0000X), or Enzyme commission number (EC:X). Oxidative phosphorylation (map00190) also contains entries for V-type ATPases which are excluded here. Fe-S scaffolds are not members of any map the manually curated set includes KOGs: K22063, K22072, K22068, K22073, K22070, K22071, K04043, K04044 and K04082. The CIA complex is likewise not grouped within BRITE and the manual set contains KOGs: K24730, K26403 and K15075. Finally, cysteine and methionine synthesis are spread across several modules and consist of the union of M00021, M00338, M00609, M00017, M00034 and M00035

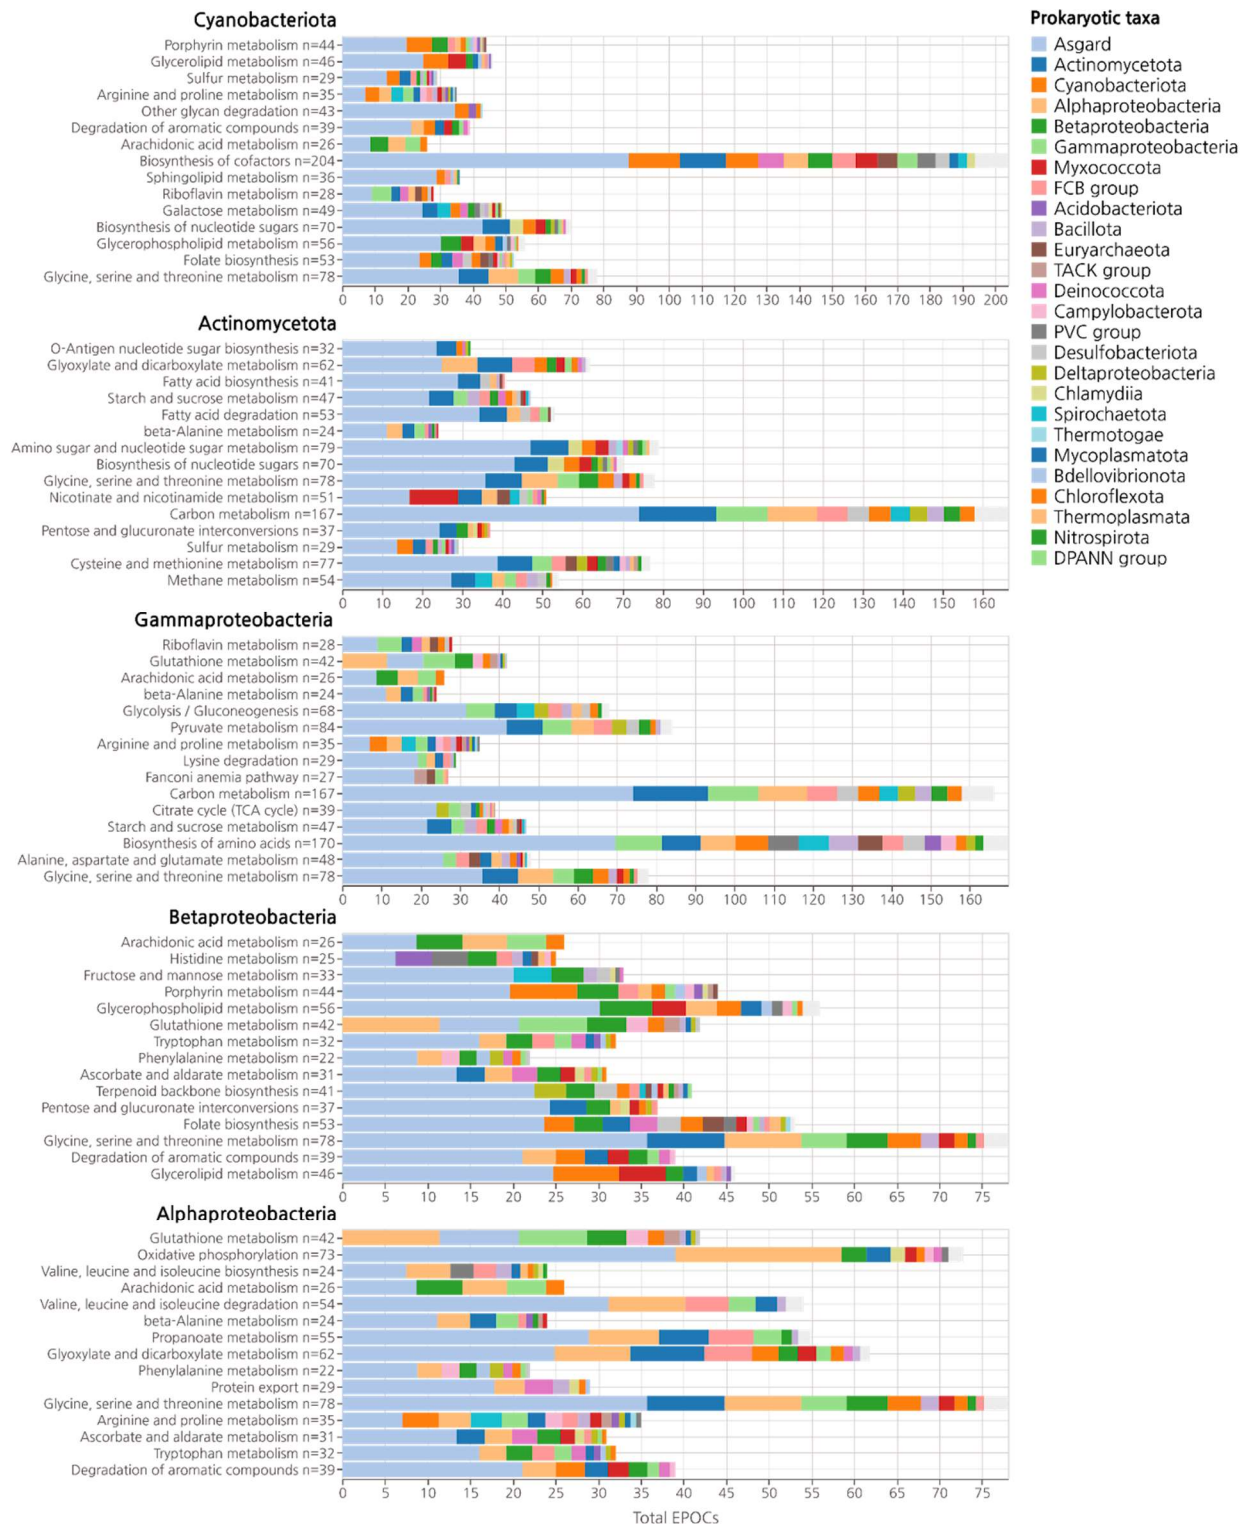

**Extended Data Figure 4. Strongest per taxa association of diverse bacteria to eukaryotes.** Top 5 non-alphaproteobacterial associated taxa with their corresponding to 15 highest ELW pathways.

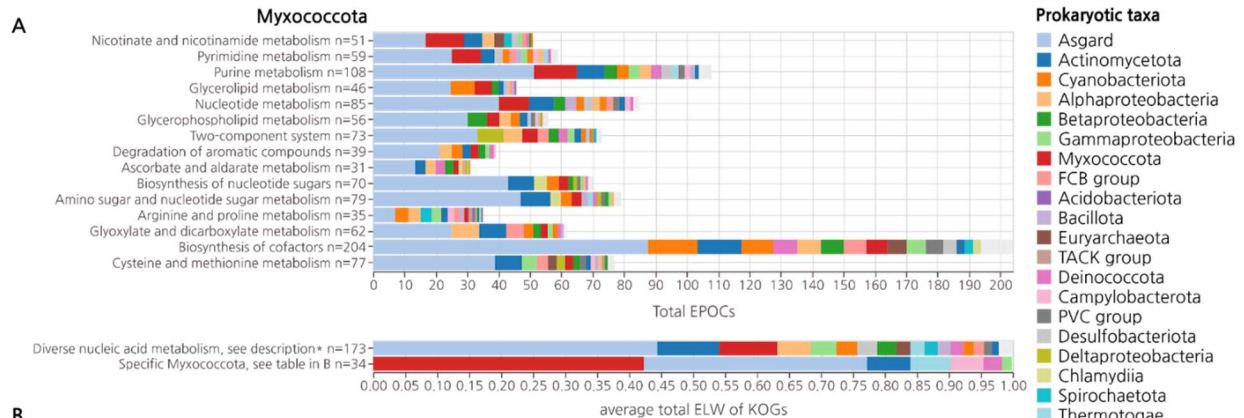

**B**

| KOG    | Gene Name        | Description                                                    | EC number(s)                 |
|--------|------------------|----------------------------------------------------------------|------------------------------|
| K10807 | RRM1             | ribonucleoside-diphosphate reductase subunit M1                | 1.17.4.1                     |
| K01517 | ADPRM            | manganese-dependent ADP-ribose/CDP-alcohol diphosphatase       | 3.6.1.13, 3.6.1.16, 3.6.1.53 |
| K01081 | E3.1.3.5         | 5'-nucleotidase                                                | 3.1.3.5                      |
| K01119 | cpdB             | 2',3'-cyclic-nucleotide 2'-phosphodiesterase / 3'-nucleotidase | 3.1.4.16, 3.1.3.6            |
| K19970 | NT5E, CD73       | 5'-nucleotidase                                                | 3.1.3.5                      |
| K03742 | pncC             | nicotinamide-nucleotide amidase                                | 3.5.1.42                     |
| K03462 | NAMPT            | nicotinamide phosphoribosyltransferase                         | 2.4.2.12                     |
| K11751 | ushA             | 5'-nucleotidase / UDP-sugar diphosphatase                      | 3.1.3.5, 3.6.1.45            |
| K01525 | apaH             | bis(5'-nucleosyl)-tetrphosphatase (symmetrical)                | 3.6.1.41                     |
| K03651 | cpdA             | 3',5'-cyclic-AMP phosphodiesterase                             | 3.1.4.53                     |
| K12410 | cobB, srtN, npdA | NAD-dependent protein deacetylase/lipoamidase                  | 2.3.1.286, 2.3.1.313         |

**Extended Data Figure 5. Sparse Myxococcotan association with eukaryotes.** A) Top, ELW breakdown of highly enriched Myxococcotan pathways showing primary association with nucleotide synthesis. Bottom, curated set of Myxococcotan enriched EPOCs containing general nucleic acid metabolism and modification pathways corresponding to KEGG map00760, map01232, map00240 and map00230 with notable presence of Myxococcota. Further selection of only those KOGs within the above pathways which include Myxococcota. B) List of KOGs with Myxococcotan presence within the curated set of nucleotide synthesis specifically highlighting phosphatases and phosphotransferases.

KOGs highly associated with diverse bacteria, see table below n=17

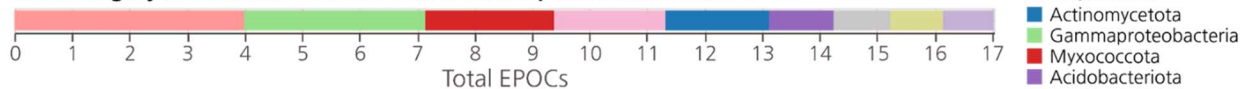

| KOG    | Gene Name             | Description                                              | EC number(s)                  |
|--------|-----------------------|----------------------------------------------------------|-------------------------------|
| K02564 | nagB, GNPDA           | glucosamine-6-phosphate deaminase                        | EC:3.5.99.6                   |
| K12862 | PLRG1, PRL1, PRP46    | pleiotropic regulator 1                                  |                               |
| K07198 | PRKAA, AMPK           | 5'-AMP-activated protein kinase, catalytic alpha subunit | EC:2.7.11.31                  |
| K10570 | ERCC8, CKN1, CSA      | DNA excision repair protein ERCC-8                       |                               |
| K06972 | PITRM1, PreP, CYM1    | presequence protease                                     | EC:3.4.24.-                   |
| K05967 | K05967                | uncharacterized protein                                  |                               |
| K03781 | katE, CAT, catB, srpA | catalase                                                 | EC:1.11.1.6                   |
| K04688 | RPS6KB                | ribosomal protein S6 kinase beta                         | EC:2.7.11.1                   |
| K01908 | ACSS3, prpE           | propionyl-CoA synthetase                                 | EC:6.2.1.17                   |
| K13137 | STRAP, UNRIP          | serine-threonine kinase receptor-associated protein      |                               |
| K06013 | STE24                 | STE24 endopeptidase                                      | EC:3.4.24.84                  |
| K14085 | ALDH7A1               | aldehyde dehydrogenase family 7 member A1                | EC:1.2.1.31, 1.2.1.8, 1.2.1.3 |
| K00597 | MTRR                  | methionine synthase reductase                            | EC:1.16.1.8                   |
| K00023 | phbB                  | acetoacetyl-CoA reductase                                | EC:1.1.1.36                   |
| K14430 | PHO87_91              | phosphate transporter                                    |                               |
| K08956 | AFG3                  | AFG3 family protein                                      | EC:3.4.24.-                   |
| K00261 | GLUD1_2, gdhA         | glutamate dehydrogenase (NAD(P)+)                        | EC:1.4.1.3                    |

**Extended Data Figure 6. KOGs with strong bacterial associations.** KOGs associated with EPOCs with stringent criteria. EPOCs must contain an eukaryotic outgroup with at least 15 unique clades encompassing LECA, have a prokaryotic sister clade with an ELW of > 0.7 which is not derived from Asgards, Euryarchaeota, the TACK group, Cyanobacteriota or Alphaproteobacteria and contain more than 20 sequences. The 32 EPOCs which meet these criteria are highlighted and their global ELW displayed.



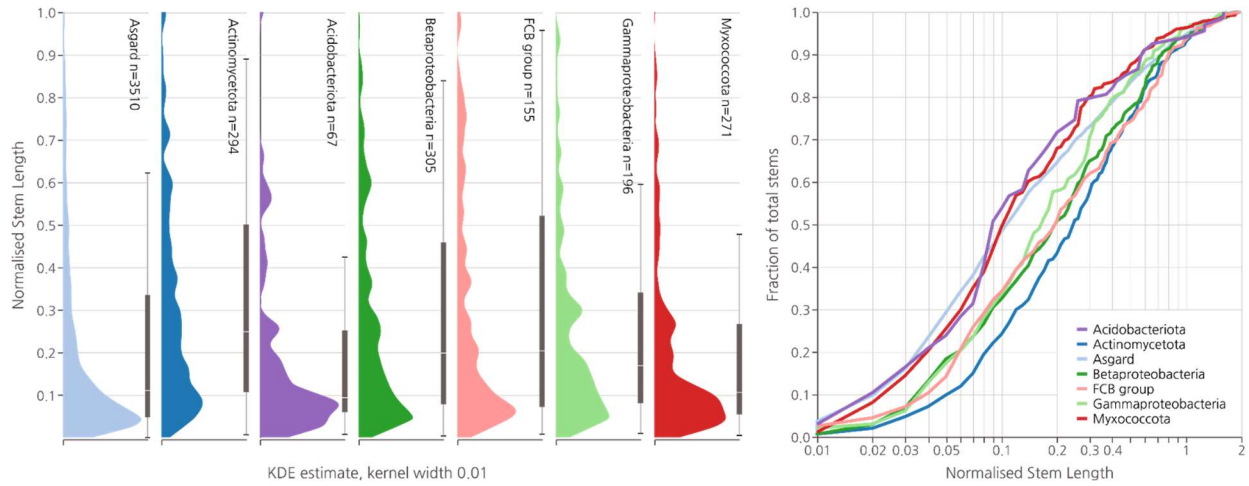

**Extended Data Figure 7: Stem length distribution for diverse bacteria compared to Asgard archaea.** Distributions of normalized stem lengths of diverse bacteria compared to Asgards. Includes all eukaryotic clade stem lengths between 0.05 and 1.0.
