# Supplementary material for: Dominant contribution of Asgard archaea to eukaryogenesis
Source: Research Square preprint supplement (doi:10.21203/rs.3.rs-5352492/v1), 2024-10-31
Supplement: Supplementary file 1 [file cde64bc428ff1fa661889203.xlsx]

## Sheet: Taxonomy Revision Species
NCBI Taxid	Proposed Class ID	Proposed Class Label	NCBI Organism Name
1978231	57723	Acidobacteriota	Acidobacteriota bacterium
1848255	1760	Actinomycetes	Actinobacteria bacterium IMCC25003
1848756	1760	Actinomycetes	Actinobacteria bacterium IMCC26103
2994972	1760	Actinomycetes	Microcella daejeonensis
2900548	201174	Actinomycetota	Actinomycetota bacterium
3053609	28211	Alphaproteobacteria	Alteriqipengyuania flavescens
529818	172820	Apusomonadidae	Thecamonas trahens
2951803	1935183	Asgard	Candidatus Lokiarchaeum ossiferum
1538547	1935183	Asgard	Candidatus Lokiarchaeum sp. GC14_75
2026747	1935183	Asgard	Candidatus Heimdallarchaeota archaeon
2053491	1935183	Asgard	Candidatus Thorarchaeota archaeon
2053489	1935183	Asgard	Candidatus Lokiarchaeota archaeon
2876573	1935183	Asgard	Candidatus Heimdallarchaeum aukensis
2876572	1935183	Asgard	Candidatus Heimdallarchaeum endolithica
1706441	1935183	Asgard	Candidatus Thorarchaeota
1706443	1935183	Asgard	Candidatus Thorarchaeota archaeon SMTZ-45
1706444	1935183	Asgard	Candidatus Thorarchaeota archaeon SMTZ1-45
1706445	1935183	Asgard	Candidatus Thorarchaeota archaeon SMTZ1-83
1837170	1935183	Asgard	Candidatus Thorarchaeota archaeon AB_25
1841596	1935183	Asgard	Candidatus Heimdallarchaeota archaeon AB_125
1841597	1935183	Asgard	Candidatus Heimdallarchaeota archaeon LC_2
1841598	1935183	Asgard	Candidatus Heimdallarchaeota archaeon LC_3
1849166	1935183	Asgard	Candidatus Lokiarchaeota archaeon CR_4
1936272	1935183	Asgard	Candidatus Heimdallarchaeota
2012490	1935183	Asgard	Candidatus Lokiarchaeota archaeon Loki_b31
2012491	1935183	Asgard	Candidatus Lokiarchaeota archaeon Loki_b32
2012493	1935183	Asgard	Candidatus Heimdallarchaeota archaeon B3_Heim
2572044	1935183	Asgard	Candidatus Helarchaeota
2591838	1935183	Asgard	Asgard group archaeon
2795490	1935183	Asgard	Candidatus Gerdarchaeota
2795491	1935183	Asgard	Candidatus Gerdarchaeota archaeon
2798905	1935183	Asgard	Candidatus Wukongarchaeota
2798906	1935183	Asgard	Candidatus Hodarchaeota
2798909	1935183	Asgard	Candidatus Baldrarchaeota
2798910	1935183	Asgard	Candidatus Hermodarchaeota
3036961	1935183	Asgard	Candidatus Njordarchaeota
1871025	91061	Bacilli	Ndongobacter massiliensis
243899	91061	Bacilli	endosymbiont 'TC1' of Trimyema compressum
1222016	91061	Bacilli	Caldicellulosiruptor changbaiensis
632292	91061	Bacilli	Caldicellulosiruptor hydrothermalis 108
632335	91061	Bacilli	Caldicellulosiruptor acetigenus I77R1B
632348	91061	Bacilli	Caldicellulosiruptor kronotskyensis 2002
632516	91061	Bacilli	Caldicellulosiruptor acetigenus 6A
632518	91061	Bacilli	Caldicellulosiruptor owensensis OL
608506	91061	Bacilli	Caldicellulosiruptor obsidiansis OB47
351627	91061	Bacilli	Caldicellulosiruptor saccharolyticus DSM 8903
521460	91061	Bacilli	Caldicellulosiruptor bescii DSM 6725
1378168	1239	Bacillota	Firmicutes bacterium ASF500
1690483	200643	Bacteroidia	Bacteroidetes bacterium UKL13-3
2875962	200643	Bacteroidia	Candidatus Sulfidibacterium hydrothermale
3034175	3018035	Bdellovibrionota	Bdellovibrionota bacterium
204461	28216	Betaproteobacteria	Thauera humireducens
2795018	2885733	Candidatus Micrarchaeia	Candidatus Fermentimicrarchaeum limneticum
1920749	2885733	Candidatus Micrarchaeia	Candidatus Mancarchaeum acidiphilum
2978047	2856052	Candidatus Nanohalobia	Candidatus Nanohaloarchaeota archaeon SVXNc
2026724	32061	Chloroflexia	Chloroflexota bacterium
525904	32061	Chloroflexia	Thermobaculum terrenum ATCC BAA-798
3003348	32061	Chloroflexia	Chloroflexota bacterium L227-S17
3038980	200795	Chloroflexota	SAR202 cluster bacterium JH1073
38654	7711	Chordata	Alligator sinensis
7897	7711	Chordata	Latimeria chalumnae
8467	7711	Chordata	Caretta caretta
8469	7711	Chordata	Chelonia mydas
8478	7711	Chordata	Chrysemys picta bellii
8479	7711	Chordata	Chrysemys picta
8496	7711	Chordata	Alligator mississippiensis
8502	7711	Chordata	Crocodylus porosus
13735	7711	Chordata	Pelodiscus sinensis
94835	7711	Chordata	Gavialis gangeticus
2755338	186801	Clostridia	Aceticella autotrophica
281847	1031332	Cryptomycota	Rozella allomycis
1763363	1117	Cyanobacteriota	cyanobacterium endosymbiont of Rhopalodia gibberula
1228987	1117	Cyanobacteriota	cyanobacterium endosymbiont of Epithemia turgida isolate EtSB Lake Yunoko
3038979	301297	Dehalococcoidia	SAR202 cluster bacterium JH545
5755	555280	Discosea	Acanthamoeba castellanii
1257118	555280	Discosea	Acanthamoeba castellanii str. Neff
2026739	28890	Euryarchaeota	Euryarchaeota archaeon
5759	2605435	Evosea	Entamoeba histolytica
370354	2605435	Evosea	Entamoeba dispar SAW760
370355	2605435	Evosea	Entamoeba invadens IP1
294381	2605435	Evosea	Entamoeba histolytica HM-1:IMSS
2026749	1783270	FCB group	Ignavibacteriota bacterium
1898104	1783270	FCB group	Bacteroidota bacterium
2053570	1783270	FCB group	Candidatus Latescibacteria bacterium
2447898	1783270	FCB group	Candidatus Kapabacteria bacterium
2052160	1783270	FCB group	Fibrobacterota bacterium
2268192	1783270	FCB group	Chlorobiota bacterium
691883	2316402	Fonticulaceae	Fonticula alba
5741	207245	Fornicata	Giardia intestinalis
2970471	203490	Fusobacteriia	Fusobacteria bacterium ZRK30
2903	2830	Haptophyta	Emiliania huxleyi
561169	2830	Haptophyta	Rebecca salina
5762	5752	Heterolobosea	Naegleria gruberi
1540872	-1	incertae sedis	Candidatus Gracilibacteria bacterium HOT-871
2572087	-1	incertae sedis	Candidatus Saccharibacteria bacterium oral taxon 955
713059	-1	incertae sedis	Candidatus Saccharibacteria bacterium oral taxon 488
2572089	-1	incertae sedis	TM7 phylum sp. oral taxon 952
713051	-1	incertae sedis	TM7 phylum sp. oral taxon 349
1898749	-1	incertae sedis	Candidatus Nitrosomarinus catalina
374847	-1	incertae sedis	Candidatus Korarchaeum cryptofilum OPF8
459349	-1	incertae sedis	Candidatus Cloacimonas acidaminovorans str. Evry
2259672	-1	incertae sedis	Candidatus Nitrosotenuis sp. DW1
1410606	-1	incertae sedis	Candidatus Nitrosopelagicus brevis
1603555	-1	incertae sedis	Candidatus Nitrosotenuis cloacae
1846278	-1	incertae sedis	Candidatus Nitrosotenuis aquarius
1920749	-1	incertae sedis	Candidatus Mancarchaeum acidiphilum
2026885	-1	incertae sedis	Candidatus Bipolaricaulis anaerobius
1930593	-1	incertae sedis	Candidatus Velamenicoccus archaeovorus
2594042	-1	incertae sedis	Candidatus Prometheoarchaeum syntrophicum
2715735	-1	incertae sedis	Candidatus Chazhemtobacterium aquaticus
33067	-1	incertae sedis	Pseudomonas sp. 101
315	-1	incertae sedis	Pseudomonas sp. ATCC19151
66693	-1	incertae sedis	Pseudomonas sp. YL
2725	-1	incertae sedis	unidentified prokaryotic organism
69011	-1	incertae sedis	Pseudomonas sp. C18
331677	-1	incertae sedis	uncultured marine bacterium 66A03
1643353	-1	incertae sedis	candidate division SR1 bacterium Aalborg_AAW-1
1579370	-1	incertae sedis	archaeon GW2011_AR10
1579378	-1	incertae sedis	archaeon GW2011_AR20
72586	-1	incertae sedis	Pseudomonas sp. CBS3
663362	-1	incertae sedis	uncultured bacterium HF130_AEPn_1
2665156	-1	incertae sedis	Candidatus Mycosynbacter amalyticus
77133	-1	incertae sedis	uncultured bacterium
798570	-1	incertae sedis	uncultured bacterium Ak20-3
700510	-1	incertae sedis	bacterium enrichment culture clone N47
1618337	-1	incertae sedis	Berkelbacteria bacterium GW2011_GWE1_39_12
1619007	-1	incertae sedis	Candidatus Wolfebacteria bacterium GW2011_GWB1_47_1
1619070	-1	incertae sedis	Candidatus Saccharibacteria bacterium GW2011_GWC2_44_17
1619077	-1	incertae sedis	candidate division TM6 bacterium GW2011_GWF2_28_16
79676	-1	incertae sedis	Pseudomonas sp. CF600
374847	-1	incertae sedis	Candidatus Korarchaeum cryptofilum OPF8
1620412	-1	incertae sedis	candidate division Kazan bacterium GW2011_GWA1_50_15
671143	-1	incertae sedis	Candidatus Methylomirabilis oxygeniifera
1394709	-1	incertae sedis	candidate division SR1 bacterium RAAC1_SR1_1
1394711	-1	incertae sedis	Candidatus Saccharibacteria bacterium RAAC3_TM7_1
2608984	-1	incertae sedis	Candidatus Nitrosymbiomonas proteolyticus
2841263	-1	incertae sedis	Candidatus Minimicrobia naudis
2841264	-1	incertae sedis	Candidatus Minimicrobia vallesae
60694	-1	incertae sedis	Pseudomonas sp. MA-1
2715735	-1	incertae sedis	Candidatus Chazhemtobacterium aquaticus
1700835	-1	incertae sedis	Candidatus Bathyarchaeota archaeon BA1
1700836	-1	incertae sedis	Candidatus Bathyarchaeota archaeon BA2
1930593	-1	incertae sedis	Candidatus Velamenicoccus archaeovorus
1898108	-1	incertae sedis	bacterium AB1
1899017	-1	incertae sedis	Candidatus Melainabacteria bacterium MEL.A1
398562	-1	incertae sedis	uncultured Roseateles sp.
2735562	-1	incertae sedis	Candidatus Absconditicoccus praedator
2355	-1	incertae sedis	unidentified bacterial endosymbiont
3034674	-1	incertae sedis	cyanobacterium endosymbiont of Epithemia clementina EcSB
1448929	-1	incertae sedis	Candidatus Fervidibacter sacchari
2004468	-1	incertae sedis	Armatimonadetes bacterium Uphvl-Ar2
2053527	-1	incertae sedis	candidate division Zixibacteria bacterium
2717699	-1	incertae sedis	bacterium BFN5
2004467	-1	incertae sedis	Armatimonadetes bacterium Uphvl-Ar1
1977087	-1	incertae sedis	Pseudomonadota bacterium
115547	-1	incertae sedis	uncultured archaeon
2053589	-1	incertae sedis	Candidatus Paceibacterota bacterium
2093792	-1	incertae sedis	Candidatus Aenigmarchaeota archaeon
2053542	-1	incertae sedis	Candidatus Daviesbacteria bacterium
2026804	-1	incertae sedis	Candidatus Woesebacteria bacterium
2053521	-1	incertae sedis	Candidatus Berkelbacteria bacterium
2052151	-1	incertae sedis	Candidatus Levybacteria bacterium
2282149	-1	incertae sedis	Candidatus Roizmanbacteria bacterium
1906665	-1	incertae sedis	archaeon
2053554	-1	incertae sedis	Candidatus Falkowbacteria bacterium
2045217	-1	incertae sedis	Candidatus Moranbacteria bacterium
2026720	-1	incertae sedis	Candidatus Saccharibacteria bacterium
1869227	-1	incertae sedis	bacterium
2052152	-1	incertae sedis	Candidatus Nomurabacteria bacterium
2053634	-1	incertae sedis	Candidatus Uhrbacteria bacterium
2026716	-1	incertae sedis	Candidatus Campbellbacteria bacterium
2030810	-1	incertae sedis	Candidatus Kaiserbacteria bacterium
1618372	-1	incertae sedis	Candidatus Beckwithbacteria bacterium GW2011_GWC1_49_16
1618633	-1	incertae sedis	Candidatus Campbellbacteria bacterium GW2011_OD1_34_28
2026714	-1	incertae sedis	Candidatus Bathyarchaeota archaeon
2052148	-1	incertae sedis	candidate division WOR-3 bacterium
2033014	-1	incertae sedis	Armatimonadota bacterium
2212470	-1	incertae sedis	Candidatus Eisenbacteria bacterium
2501609	-1	incertae sedis	Candidatus Bipolaricaulis sibiricus
2250274	-1	incertae sedis	Candidatus Micrarchaeota archaeon
2052166	-1	incertae sedis	Candidatus Melainabacteria bacterium
2829680	-1	incertae sedis	bacterium SCSIO 12827
2829673	-1	incertae sedis	bacterium SCSIO 12643
1862133	-1	incertae sedis	Candidatus Gracilibacteria bacterium 28_42_T64
2980174	-1	incertae sedis	Candidatus Saccharibacteria bacterium TM7i
2099670	-1	incertae sedis	Candidatus Dojkabacteria bacterium
2093793	-1	incertae sedis	Candidatus Nealsonbacteria bacterium
2026736	-1	incertae sedis	Candidatus Diapherotrites archaeon
2030811	-1	incertae sedis	Candidatus Peregrinibacteria bacterium
2202151	-1	incertae sedis	Aquificota bacterium
2026803	-1	incertae sedis	Candidatus Woesearchaeota archaeon
2052149	-1	incertae sedis	Candidatus Aminicenantes bacterium
2250272	-1	incertae sedis	Candidatus Coatesbacteria bacterium
2053557	-1	incertae sedis	Candidatus Giovannonibacteria bacterium
2750080	-1	incertae sedis	Candidatus Sungbacteria bacterium
2750078	-1	incertae sedis	Candidatus Niyogibacteria bacterium
3043262	-1	incertae sedis	Candidatus Nealsonbacteria bacterium DGGOD1a
2891165	-1	incertae sedis	Candidatus Dependentiae bacterium Noda2021
2030800	-1	incertae sedis	Elusimicrobiota bacterium
1579373	-1	incertae sedis	archaeon GW2011_AR15
1618600	-1	incertae sedis	Candidatus Woesebacteria bacterium GW2011_GWF1_31_35
2306012	-1	incertae sedis	Candidatus Bipolaricaulota bacterium
2052139	-1	incertae sedis	Patescibacteria group bacterium
2762014	-1	incertae sedis	Candidatus Parcubacteria bacterium
2026773	-1	incertae sedis	Candidatus Pacearchaeota archaeon
2829674	-1	incertae sedis	bacterium SCSIO 12696
2829675	-1	incertae sedis	bacterium SCSIO 12741
1763547	-1	incertae sedis	Vermiphilus pyriformis
2783868	-1	incertae sedis	Abditibacteriota bacterium
2829681	-1	incertae sedis	bacterium SCSIO 12844
2681877	-1	incertae sedis	bacterium 3DAC
1932692	1313211	Lentisphaeria	Lentisphaerota bacterium
2886196	1313211	Lentisphaeria	Lentisphaerae bacterium WC36
222440	2611341	Metamonada	Streblomastix strix
412133	2611341	Metamonada	Trichomonas vaginalis G3
184922	2611341	Metamonada	Giardia lamblia ATCC 50803
6035	6029	Microsporidia	Encephalitozoon cuniculi
72359	6029	Microsporidia	Trachipleistophora hominis
578460	6029	Microsporidia	Vairimorpha ceranae BRL01
284813	6029	Microsporidia	Encephalitozoon cuniculi GB-M1
907965	6029	Microsporidia	Encephalitozoon hellem ATCC 50504
876142	6029	Microsporidia	Encephalitozoon intestinalis ATCC 50506
1178016	6029	Microsporidia	Encephalitozoon romaleae SJ-2008
1238993	544448	Mycoplasmatota	Mycoplasmoides pneumoniae M129-B7
1911684	544448	Mycoplasmatota	Tenericutes bacterium MO-XQ
1911683	544448	Mycoplasmatota	Tenericutes bacterium MZ-XQ
2725268	544448	Mycoplasmatota	Hujiaoplasma nucleasis
2231116	544448	Mycoplasmatota	Mycoplasmatota bacterium
2098	544448	Mycoplasmatota	Metamycoplasma hominis
45363	544448	Mycoplasmatota	Metamycoplasma alkalescens
92401	544448	Mycoplasmatota	Metamycoplasma cloacale
2116	544448	Mycoplasmatota	Malacoplasma iowae
1048830	544448	Mycoplasmatota	Malacoplasma iowae 695
662947	544448	Mycoplasmatota	Mycoplasmoides genitalium M2288
662945	544448	Mycoplasmatota	Mycoplasmoides genitalium M6320
662946	544448	Mycoplasmatota	Mycoplasmoides genitalium M6282
243273	544448	Mycoplasmatota	Mycoplasmoides genitalium G37
663918	544448	Mycoplasmatota	Mycoplasmoides genitalium M2321
272634	544448	Mycoplasmatota	Mycoplasmoides pneumoniae M129
2104	544448	Mycoplasmatota	Mycoplasmoides pneumoniae
1112856	544448	Mycoplasmatota	Mycoplasmoides pneumoniae 309
272633	544448	Mycoplasmatota	Malacoplasma penetrans HF-2
710127	544448	Mycoplasmatota	Mycoplasmoides gallisepticum str. R(low)
2096	544448	Mycoplasmatota	Mycoplasmoides gallisepticum
1159202	544448	Mycoplasmatota	Mycoplasmoides gallisepticum NC06_2006.080-5-2P
1159204	544448	Mycoplasmatota	Mycoplasmoides gallisepticum NC08_2008.031-4-3P
1006581	544448	Mycoplasmatota	Mycoplasmoides gallisepticum S6
1159203	544448	Mycoplasmatota	Mycoplasmoides gallisepticum CA06_2006.052-5-2P
2111	544448	Mycoplasmatota	Metamycoplasma arthritidis
243272	544448	Mycoplasmatota	Metamycoplasma arthritidis 158L3-1
347256	544448	Mycoplasmatota	Metamycoplasma hominis ATCC 23114
1267000	544448	Mycoplasmatota	Metamycoplasma hominis ATCC 27545
1263835	544448	Mycoplasmatota	Mycoplasmoides pneumoniae MAC
710128	544448	Mycoplasmatota	Mycoplasmoides gallisepticum str. R(high)
708616	544448	Mycoplasmatota	Mycoplasmoides gallisepticum str. F
1159197	544448	Mycoplasmatota	Mycoplasmoides gallisepticum VA94_7994-1-7P
1159201	544448	Mycoplasmatota	Mycoplasmoides gallisepticum WI01_2001.043-13-2P
1159199	544448	Mycoplasmatota	Mycoplasmoides gallisepticum NC96_1596-4-2P
1159198	544448	Mycoplasmatota	Mycoplasmoides gallisepticum NC95_13295-2-2P
1159200	544448	Mycoplasmatota	Mycoplasmoides gallisepticum NY01_2001.047-5-1P
1233262	544448	Mycoplasmatota	Mycoplasmoides pneumoniae PO1
1236904	544448	Mycoplasmatota	Mycoplasmoides pneumoniae PI 1428
1213463	544448	Mycoplasmatota	Mycoplasmoides pneumoniae 19294
2121	544448	Mycoplasmatota	Metamycoplasma orale
2124	544448	Mycoplasmatota	Metamycoplasma salivarium
92400	544448	Mycoplasmatota	[Mycoplasma] anseris
29559	544448	Mycoplasmatota	Metamycoplasma hyosynoviae
1441379	544448	Mycoplasmatota	Mycoplasmoides pneumoniae M29
722438	544448	Mycoplasmatota	Mycoplasmoides pneumoniae FH
29554	544448	Mycoplasmatota	Metamycoplasma canadense
142649	544448	Mycoplasmatota	Metamycoplasma phocicerebrale
1263761	544448	Mycoplasmatota	Mycoplasmoides pneumoniae 39443
1263760	544448	Mycoplasmatota	Mycoplasmoides pneumoniae 85138
1263757	544448	Mycoplasmatota	Mycoplasmoides pneumoniae 54524
1263758	544448	Mycoplasmatota	Mycoplasmoides pneumoniae 51494
1263756	544448	Mycoplasmatota	Mycoplasmoides pneumoniae 54089
1263763	544448	Mycoplasmatota	Mycoplasmoides pneumoniae M1139
1263762	544448	Mycoplasmatota	Mycoplasmoides pneumoniae 85084
1280940	544448	Mycoplasmatota	Mycoplasmoides pneumoniae M2592
142651	544448	Mycoplasmatota	[Mycoplasma] phocae
295358	544448	Mycoplasmatota	Mesomycoplasma hyopneumoniae 232
262719	544448	Mycoplasmatota	Mesomycoplasma hyopneumoniae J
262722	544448	Mycoplasmatota	Mesomycoplasma hyopneumoniae 7448
262723	544448	Mycoplasmatota	Mycoplasmopsis synoviae 53
754503	544448	Mycoplasmatota	Mesomycoplasma hyopneumoniae 7422
33923	544448	Mycoplasmatota	Mycoplasmopsis felis
1246955	544448	Mycoplasmatota	Mycoplasmopsis cynos C142
2110	544448	Mycoplasmatota	Mycoplasmopsis agalactiae
2113	544448	Mycoplasmatota	Mycoplasmopsis californica
2112	544448	Mycoplasmatota	Mycoplasmopsis bovigenitalium
2120	544448	Mycoplasmatota	Mesomycoplasma neurolyticum
496833	544448	Mycoplasmatota	Mycoplasmopsis fermentans PG18
267748	544448	Mycoplasmatota	Mycoplasma mobile 163K
1316930	544448	Mycoplasmatota	Mycoplasmopsis bovis CQ-W70
498716	544448	Mycoplasmatota	human intestinal bacterium PUE
171279	544448	Mycoplasmatota	Mycoplasmopsis anatis
171281	544448	Mycoplasmatota	Mycoplasmopsis citelli
171282	544448	Mycoplasmatota	Mycoplasmopsis columboralis
171285	544448	Mycoplasmatota	Mycoplasmopsis glycophila
1318617	544448	Mycoplasmatota	Candidatus Malacoplasma girerdii
565575	544448	Mycoplasmatota	Ureaplasma urealyticum serovar 10 str. ATCC 33699
42094	544448	Mycoplasmatota	Ureaplasma diversum
272635	544448	Mycoplasmatota	Mycoplasmopsis pulmonis UAB CTIP
273119	544448	Mycoplasmatota	Ureaplasma parvum serovar 3 str. ATCC 700970
76629	544448	Mycoplasmatota	Mycoplasmopsis gallopavonis
142650	544448	Mycoplasmatota	Mycoplasmopsis phocirhinis
505682	544448	Mycoplasmatota	Ureaplasma parvum serovar 3 str. ATCC 27815
572263	544448	Mycoplasmatota	Mesomycoplasma conjunctivae HRC/581
48003	544448	Mycoplasmatota	Mycoplasmopsis pullorum
114880	544448	Mycoplasmatota	Mycoplasmopsis columbinasalis
114881	544448	Mycoplasmatota	Mycoplasmopsis columbina
114885	544448	Mycoplasmatota	Mycoplasmopsis maculosa
347257	544448	Mycoplasmatota	Mycoplasmopsis agalactiae PG2
53558	544448	Mycoplasmatota	Mycoplasmopsis edwardii
86660	544448	Mycoplasmatota	Mesomycoplasma dispar
1267001	544448	Mycoplasmatota	Mycoplasmopsis synoviae ATCC 25204
907287	544448	Mycoplasmatota	Mesomycoplasma hyopneumoniae 168
743966	544448	Mycoplasmatota	Mesomycoplasma bovoculi M165/69
743971	544448	Mycoplasmatota	Mesomycoplasma flocculare ATCC 27399
289397	544448	Mycoplasmatota	Mycoplasmopsis bovis PG45
29553	544448	Mycoplasmatota	Mycoplasmopsis bovirhinis
29555	544448	Mycoplasmatota	Mycoplasmopsis canis
29556	544448	Mycoplasmatota	Mycoplasmopsis gallinacea
2094	544448	Mycoplasmatota	Mycoplasmopsis arginini
2099	544448	Mycoplasmatota	Mesomycoplasma hyopneumoniae
2100	544448	Mycoplasmatota	Mesomycoplasma hyorhinis
2107	544448	Mycoplasmatota	Mycoplasmopsis pulmonis
2109	544448	Mycoplasmatota	Mycoplasmopsis synoviae
2130	544448	Mycoplasmatota	Ureaplasma urealyticum
28903	544448	Mycoplasmatota	Mycoplasmopsis bovis
29561	544448	Mycoplasmatota	Mycoplasmopsis meleagridis
38504	544448	Mycoplasmatota	Ureaplasma parvum serovar 3
45361	544448	Mycoplasmatota	Mesomycoplasma conjunctivae
134821	544448	Mycoplasmatota	Ureaplasma parvum
171284	544448	Mycoplasmatota	Mycoplasmopsis cynos
634997	544448	Mycoplasmatota	Mesomycoplasma hyorhinis DBS 1050
637387	544448	Mycoplasmatota	Mycoplasmopsis fermentans JER
872331	544448	Mycoplasmatota	Mesomycoplasma hyorhinis HUB-1
936139	544448	Mycoplasmatota	Mesomycoplasma hyorhinis MCLD
943945	544448	Mycoplasmatota	Mycoplasmopsis fermentans M64
956483	544448	Mycoplasmatota	Mycoplasmopsis bovis Hubei-1
1116211	544448	Mycoplasmatota	Mesomycoplasma hyopneumoniae 168-L
1117644	544448	Mycoplasmatota	Mycoplasmopsis canis PG 14
1118964	544448	Mycoplasmatota	Mesomycoplasma hyorhinis SK76
1129369	544448	Mycoplasmatota	Mesomycoplasma hyorhinis GDL-1
1397850	544448	Mycoplasmatota	Mycoplasmopsis californica HAZ160_1
29562	544448	Mycoplasmatota	Mesomycoplasma ovipneumoniae
92758	544448	Mycoplasmatota	Mycoplasmoides fastidiosum
55603	544448	Mycoplasmatota	Mycoplasmopsis caviae
171286	544448	Mycoplasmatota	Mesomycoplasma lagogenitalium
92402	544448	Mycoplasmatota	Metamycoplasma equirhinis
767465	544448	Mycoplasmatota	Mycoplasmopsis bovis HB0801
171288	544448	Mycoplasmatota	Mesomycoplasma molare
114883	544448	Mycoplasmatota	Mycoplasmopsis equigenitalium
743968	544448	Mycoplasmatota	Mesomycoplasma ovipneumoniae ATCC 29419
2259673	1643678	Nitrososphaeria	Nitrosarchaeum sp. AC2
2795383	1643678	Nitrososphaeria	Nitrosopumilus sp. K4
1229908	1643678	Nitrososphaeria	Candidatus Nitrosopumilus koreensis AR1
1959104	1643678	Nitrososphaeria	Nitrosopumilus oxyclinae
2508726	1643678	Nitrososphaeria	Candidatus Nitrosopumilus sp. SW
1470067	1643678	Nitrososphaeria	Nitrosopumilus ureiphilus
1229909	1643678	Nitrososphaeria	Candidatus Nitrosopumilus sediminis
1470066	1643678	Nitrososphaeria	Nitrosopumilus cobalaminigenes
1580092	1643678	Nitrososphaeria	Nitrosopumilus adriaticus
436308	1643678	Nitrososphaeria	Nitrosopumilus maritimus SCM1
1582439	1643678	Nitrososphaeria	Nitrosopumilus piranensis
1410606	1643678	Nitrososphaeria	Candidatus Nitrosopelagicus brevis
311458	1643678	Nitrososphaeria	Candidatus Caldarchaeum subterraneum
414004	1643678	Nitrososphaeria	Cenarchaeum symbiosum A
1078905	1643678	Nitrososphaeria	Candidatus Nitrosotalea devanaterra
1603555	1643678	Nitrososphaeria	Candidatus Nitrosotenuis cloacae
2259672	1643678	Nitrososphaeria	Candidatus Nitrosotenuis sp. DW1
1903276	1643678	Nitrososphaeria	Candidatus Nitrosotalea okcheonensis
1353246	1643678	Nitrososphaeria	Candidatus Nitrosotenuis chungbukensis
2026887	40117	Nitrospirota	Nitrospirota bacterium
4792	4762	Oomycota	Phytophthora parasitica
67593	4762	Oomycota	Phytophthora sojae
695850	4762	Oomycota	Saprolegnia parasitica CBS 223.65
403677	4762	Oomycota	Phytophthora infestans T30-4
1094619	4762	Oomycota	Phytophthora sojae strain P6497
5722	5719	Parabasalia	Trichomonas vaginalis
31276	2497438	Perkinsozoa	Perkinsus marinus
1930275	203683	Planctomycetia	Planctomycetes bacterium K23_9
2527975	203683	Planctomycetia	Planctomycetes bacterium Pan216
2528011	203683	Planctomycetia	Planctomycetes bacterium Pla133
2528008	203683	Planctomycetia	Planctomycetes bacterium Pla163
2528012	203683	Planctomycetia	Planctomycetes bacterium Pla86
2528018	203683	Planctomycetia	Planctomycetes bacterium Poly30
2527962	203683	Planctomycetia	Planctomycetes bacterium K2D
2026780	203683	Planctomycetia	Planctomycetota bacterium
2527998	203683	Planctomycetia	Planctomycetes bacterium MalM25
2528025	203683	Planctomycetia	Planctomycetes bacterium SV_7m_r
448385	3031711	Polyangia	Sorangium cellulosum So ce56
56	3031711	Polyangia	Sorangium cellulosum
1254432	3031711	Polyangia	Sorangium cellulosum So0157-2
502025	3031711	Polyangia	Haliangium ochraceum DSM 14365
52	3031711	Polyangia	Chondromyces crocatus
927083	3031711	Polyangia	Sandaracinus amylolyticus
888845	3031711	Polyangia	Minicystis rosea
1391654	3031711	Polyangia	Labilithrix luteola
1882918	3031711	Polyangia	Pajaroellobacter abortibovis
2567896	3031711	Polyangia	Polyangium aurulentum
2969250	3031711	Polyangia	Sorangium sp. Soce836
2995304	3031711	Polyangia	Nannocystis poenicansa
2035772	1783257	PVC group	Candidatus Omnitrophota bacterium
2026742	1783257	PVC group	Gemmatimonadota bacterium
2026799	1783257	PVC group	Verrucomicrobiota bacterium
3032587	1783257	PVC group	Lentisphaerota bacterium ZTH
3040511	1783257	PVC group	Kiritimatiellota bacterium B12222
1779382	1853220	Rhodothermota	Rhodothermaceae bacterium RA
146919	1853220	Rhodothermota	Salinibacter ruber
309807	1853220	Rhodothermota	Salinibacter ruber DSM 13855
761659	1853220	Rhodothermota	Salinibacter ruber M8
518766	1853220	Rhodothermota	Rhodothermus marinus DSM 4252
762570	1853220	Rhodothermota	Rhodothermus marinus SG0.5JP17-172
29549	1853220	Rhodothermota	Rhodothermus marinus
460511	203692	Spirochaetia	uncultured Spirochaetota bacterium
1285782	203692	Spirochaetia	Treponema paraluiscuniculi
2202144	203691	Spirochaetota	Spirochaetota bacterium
2268202	649775	Synergistia	Synergistota bacterium
2026795	1783275	TACK group	Nitrososphaerota archaeon
2202153	200940	Thermodesulfobacteriota	Thermodesulfobacteriota bacterium
439481	183967	Thermoplasmata	Aciduliprofundum boonei T469
673860	183967	Thermoplasmata	Aciduliprofundum sp. MAR08-339
10228	3043701	Uniplacotomia	Trichoplax adhaerens
1637999	203494	Verrucomicrobiae	Verrucomicrobia bacterium IMCC26134
2488809	203494	Verrucomicrobiae	Verrucomicrobia bacterium S94
2730359	203494	Verrucomicrobiae	Methylacidimicrobium sp. AP8
2796139	203494	Verrucomicrobiae	Methylacidimicrobium sp. B4
2529394	203494	Verrucomicrobiae	Candidatus Pinguicoccus supinus
2841811	203494	Verrucomicrobiae	Candidatus Organicella extenuata
1169539	2605696	Vitrellaceae	Vitrella brassicaformis

## Sheet: Taxonomy Revision Classes
NCBI Taxid	NCBI Class	NCBI superkingdom	Revised Class ID	Revised Class Label
51967	Korarchaeia	Archaea	1783275	TACK group
183924	Thermoprotei	Archaea	1783275	TACK group
183925	Methanobacteria	Archaea	28890	Euryarchaeota
183939	Methanococci	Archaea	28890	Euryarchaeota
183963	Halobacteria	Archaea	28890	Euryarchaeota
183967	Thermoplasmata	Archaea	183967	Thermoplasmata
183968	Thermococci	Archaea	28890	Euryarchaeota
183980	Archaeoglobi	Archaea	28890	Euryarchaeota
183988	Methanopyri	Archaea	28890	Euryarchaeota
224756	Methanomicrobia	Archaea	28890	Euryarchaeota
1051663	Nanohaloarchaea	Archaea	28890	Euryarchaeota
1643678	Nitrososphaeria	Archaea	1783275	TACK group
1935183	Asgard	Archaea	1935183	Asgard
2798274	Conexivisphaeria	Archaea	1783275	TACK group
2856052	Candidatus Nanohalobia	Archaea	1783276	DPANN group
2885733	Micrarchaeia	Archaea	1783276	DPANN group
2885733	Candidatus Micrarchaeia	Archaea	1783276	DPANN group
2885752	Candidatus Nanoarchaeia	Archaea	1783276	DPANN group
1236	Candidatus Lokiarchaeia	Archaea	1935183	Asgard
1760	Candidatus Nanohaloarchaea	Archaea	28890	Euryarchaeota
28211	Candidatus Bathyarchaeia	Archaea	1783275	TACK group
28216	Candidatus Dadabacteria	Archaea	200940	Desulfobacteriota
28221	Candidatus Desulfofervidia	Archaea	200940	Desulfobacteriota
31969	Candidatus Methanoliparia	Archaea	28890	Euryarchaeota
3039863	Candidatus Asgardarchaeia	Archaea	1935183	Asgard
3049162	Candidatus Jordarchaeia	Archaea	1935183	Asgard
1051663	Candidatus Sifarchaeia	Archaea	1935183	Asgard
1117	Candidatus Odinarchaeia	Archaea	1935183	Asgard
32015	Candidatus Poseidoniia	Archaea	183967	Thermoplasmata
32061	Euryarchaeota	Archaea	28890	Euryarchaeota
67799	Methanonatronarchaeia	Archaea	28890	Euryarchaeota
68337	Nanobdellia	Archaea		DELETE
84992	Nitrospirota	Archaea	40117	Nitrospirota
84995	TACK group	Archaea	1783275	TACK group
84998	Gammaproteobacteria	Bacteria	1236	Gammaproteobacteria
91061	Actinomycetes	Bacteria	201174	Actinomycetota
117743	Alphaproteobacteria	Bacteria	28211	Alphaproteobacteria
117747	Betaproteobacteria	Bacteria	28216	Betaproteobacteria
118001	Deltaproteobacteria	Bacteria	28221	Deltaproteobacteria
134549	Mollicutes	Bacteria	544448	Mycoplasmatota
186801	Candidatus Cloacimonadia	Bacteria	1783270	FCB group
187857	Cyanobacteriota	Bacteria	1117	Cyanobacteriota
188708	Myxococcia	Bacteria	2818505	Myxococcota
188787	Chloroflexia	Bacteria	200795	Chloroflexota
189775	Thermodesulfobacteria	Bacteria	200940	Desulfobacteriota
191410	Deferribacteres	Bacteria		DELETE
200643	Acidimicrobiia	Bacteria	201174	Actinomycetota
3121607	Rubrobacteria	Bacteria	201174	Actinomycetota
3121607	Coriobacteriia	Bacteria	201174	Actinomycetota
203486	Bacilli	Bacteria	1239	Bacillota
203490	Flavobacteriia	Bacteria	1783270	FCB group
1042312	Sphingobacteriia	Bacteria	1783270	FCB group
3037982	Chrysiogenetes	Bacteria		DELETE
1752716	Spartobacteria	Bacteria	1783257	PVC group
3031450	Clostridia	Bacteria	1239	Bacillota
2545688	Aquificae	Bacteria		DELETE
3067288	Thermotogae	Bacteria	188708	Thermotogae
2823877	Deinococci	Bacteria	1297	Deinococcota
2949321	Thermomicrobia	Bacteria		DELETE
2171982	Chlorobiia	Bacteria	1783270	FCB group
3067281	Bacteroidia	Bacteria	1783270	FCB group
1801911	Bipolaricaulia	Bacteria		DELETE
2599185	incertae sedis	Bacteria		DELETE
2315419	Dictyoglomia	Bacteria		DELETE
2897345	Fusobacteriia	Bacteria		DELETE
3086086	Armatimonadia	Bacteria		DELETE
1077257	Candidatus Nanosyncoccalia	Bacteria		DELETE
57723	Candidatus Peribacteria	Bacteria		DELETE
201174	Candidatus Sumerlaeia	Bacteria		DELETE
1239	Candidatus Uabimicrobiia	Bacteria	1783257	PVC group
3018035	Dethiobacteria	Bacteria	1239	Bacillota
200795	Chthonomonadetes	Bacteria		DELETE
28890	Acidobacteriota	Bacteria	57723	Acidobacteriota
1783270	Actinomycetota	Bacteria	201174	Actinomycetota
171536	Bacillota	Bacteria	1239	Bacillota
544448	Bdellovibrionota	Bacteria	3018035	Bdellovibrionota
2974821	Chloroflexota	Bacteria	200795	Chloroflexota
1293498	Nitrospinia	Bacteria		DELETE
40117	PVC group	Bacteria	1783257	PVC group
1783257	Spirochaetota	Bacteria	203691	Spirochaetota
203691	Thermodesulfobacteriota	Bacteria	200940	Desulfobacteriota
1783275	Thermoflexia	Bacteria	200795	Chloroflexota
200940	Verrucomicrobiae	Bacteria	1783257	PVC group
1495646	Planctomycetia	Bacteria	1783257	PVC group
203494	Spirochaetia	Bacteria	203691	Spirochaetota
203683	Nitrospiria	Bacteria	40117	Nitrospirota
203692	Chlamydiia	Bacteria	204429	Chlamydiia
203693	Fibrobacteria	Bacteria	1783270	FCB group
204429	Terriglobia	Bacteria	57723	Acidobacteriota
204430	Gemmatimonadetes	Bacteria	1783270	FCB group
204432	Anaerolineae	Bacteria	200795	Chloroflexota
219685	Dehalococcoidia	Bacteria	200795	Chloroflexota
292625	Gracilibacteria	Bacteria		DELETE
301297	Ktedonobacteria	Bacteria	200795	Chloroflexota
363464	Opitutae	Bacteria	1783257	PVC group
388447	Endomicrobiia	Bacteria		DELETE
414999	Caldilineae	Bacteria	200795	Chloroflexota
447830	Erysipelotrichia	Bacteria	1239	Bacillota
475962	Holophagae	Bacteria	57723	Acidobacteriota
526524	Zetaproteobacteria	Bacteria		DELETE
533205	Elusimicrobia	Bacteria		DELETE
580370	Synergistia	Bacteria		DELETE
641853	Phycisphaerae	Bacteria	1783257	PVC group
649775	Caldisericia	Bacteria		DELETE
666505	Cytophagia	Bacteria	1783270	FCB group
693071	Ignavibacteria	Bacteria	1783270	FCB group
768503	Nitriliruptoria	Bacteria	201174	Actinomycetota
795747	Negativicutes	Bacteria	1239	Bacillota
908620	Lentisphaeria	Bacteria	1783257	PVC group
909932	Ardenticatenia	Bacteria	200795	Chloroflexota
1313211	Thermoleophilia	Bacteria	201174	Actinomycetota
1382928	Oligoflexia	Bacteria		DELETE
1497346	Blastocatellia	Bacteria	57723	Acidobacteriota
1553900	Fimbriimonadia	Bacteria		DELETE
1562566	Limnochordia	Bacteria	1239	Bacillota
1663419	Tissierellia	Bacteria	1239	Bacillota
1676648	Acidithiobacillia	Bacteria		DELETE
1737404	Vicinamibacteria	Bacteria	57723	Acidobacteriota
1807140	Rhodothermia	Bacteria	1783270	FCB group
1813735	Rhodothermota	Bacteria	1783270	FCB group
1853222	Balneolia	Bacteria	1783270	FCB group
1853220	Chitinophagia	Bacteria	1783270	FCB group
1853221	Candidatus Izimaplasma	Bacteria	544448	Mycoplasmatota
1853228	Kiritimatiellia	Bacteria	1783257	PVC group
1912503	Saprospiria	Bacteria	1783270	FCB group
1921781	Methylacidiphilae	Bacteria	1783257	PVC group
1937959	Calditrichia	Bacteria		DELETE
1955630	Hydrogenophilia	Bacteria		DELETE
1962850	Saccharimonadia	Bacteria		DELETE
2008785	Candidatus Saccharimonadia	Bacteria		DELETE
2093818	Coprothermobacteria	Bacteria		DELETE
2093818	Candidatus Thermofonsia	Bacteria	200795	Chloroflexota
2138243	Candidatus Babeliae	Bacteria		DELETE
2364196	Candidatus Brocadiia	Bacteria	1783257	PVC group
2497643	Tepidiformia	Bacteria	200795	Chloroflexota
2517206	Thermodesulfovibrionia	Bacteria		DELETE
2682225	Atribacteria	Bacteria		DELETE
2811502	Tichowtungiia	Bacteria	1783257	PVC group
2847774	Syntrophobacteria	Bacteria	200940	Desulfobacteriota
2907184	Desulfobacteria	Bacteria	200940	Desulfobacteriota
3024408	Cyanophyceae	Bacteria	1117	Cyanobacteriota
3024418	Bdellovibrionia	Bacteria		DELETE
3028117	Bacteriovoracia	Bacteria	3018035	Bdellovibrionota
3031418	Desulfovibrionia	Bacteria	200940	Desulfobacteriota
3031419	Desulfobulbia	Bacteria	200940	Desulfobacteriota
3031449	Desulfarculia	Bacteria	200940	Desulfobacteriota
3031451	Desulfobaccia	Bacteria	200940	Desulfobacteriota
3031646	Syntrophia	Bacteria	200940	Desulfobacteriota
3031647	Desulfomonilia	Bacteria	200940	Desulfobacteriota
3031648	Desulfuromonadia	Bacteria	200940	Desulfobacteriota
3031650	Polyangia	Bacteria	2818505	Myxococcota
3031651	Epsilonproteobacteria	Bacteria	29547	Campylobacterota
3031711	Desulfurellia	Bacteria	29547	Campylobacterota
3031852	FCB group	Bacteria	1783270	FCB group
3031853	Mycoplasmatota	Bacteria	544448	Mycoplasmatota
2759	Eukaryota	Eukaryota	2759	Eukaryota
2797	Bangiophyceae	Eukaryota	2797	Rhodophyta
2806	Florideophyceae	Eukaryota	2797	Rhodophyta
2825	Chrysophyceae	Eukaryota	2696291	Ochrophyta
2830	Haptophyta	Eukaryota	2608109	Haptista
2833	Xanthophyceae	Eukaryota	2696291	Ochrophyta
2864	Dinophyceae	Eukaryota	2864	Dinophyceae
2870	Phaeophyceae	Eukaryota	2696291	Ochrophyta
3027	Cryptophyceae	Eukaryota	3027	Cryptophyceae
3035	Euglenida	Eukaryota	3035	Euglenida
3041	Chlorophyta	Eukaryota	3041	Chlorophyta
3166	Chlorophyceae	Eukaryota	3041	Chlorophyta
3214	Bryopsida	Eukaryota	35493	Streptophyta
3372	Gnetopsida	Eukaryota	35493	Streptophyta
3398	Magnoliopsida	Eukaryota	35493	Streptophyta
4762	Oomycota	Eukaryota	4762	Oomycota
4891	Saccharomycetes	Eukaryota	4890	Ascomycota
5257	Ustilaginomycetes	Eukaryota	5204	Basidiomycota
5653	Kinetoplastea	Eukaryota	3035	Euglenida
5719	Parabasalia	Eukaryota	2611341	Metamonada
5747	Eustigmatophyceae	Eukaryota	2696291	Ochrophyta
5752	Heterolobosea	Eukaryota	5752	Heterolobosea
5977	Colpodea	Eukaryota	5878	Ciliophora
5988	Litostomatea	Eukaryota	5878	Ciliophora
6000	Prostomatea	Eukaryota	5878	Ciliophora
6015	Nassophorea	Eukaryota	5878	Ciliophora
6020	Oligohymenophorea	Eukaryota	5878	Ciliophora
6029	Microsporidia	Eukaryota	6029	Microsporidia
6042	Demospongiae	Eukaryota	33208	Metazoa
6074	Hydrozoa	Eukaryota	33208	Metazoa
6101	Anthozoa	Eukaryota	33208	Metazoa
6142	Scyphozoa	Eukaryota	33208	Metazoa
6178	Trematoda	Eukaryota	33208	Metazoa
6199	Cestoda	Eukaryota	33208	Metazoa
6341	Polychaeta	Eukaryota	33208	Metazoa
6448	Gastropoda	Eukaryota	33208	Metazoa
6544	Bivalvia	Eukaryota	33208	Metazoa
6605	Cephalopoda	Eukaryota	33208	Metazoa
6658	Branchiopoda	Eukaryota	33208	Metazoa
6854	Arachnida	Eukaryota	33208	Metazoa
7540	Chilopoda	Eukaryota	33208	Metazoa
7625	Echinoidea	Eukaryota	33208	Metazoa
7711	Chordata	Eukaryota	33208	Metazoa
7713	Ascidiacea	Eukaryota	33208	Metazoa
7777	Chondrichthyes	Eukaryota	33208	Metazoa
8292	Amphibia	Eukaryota	33208	Metazoa
8504	Lepidosauria	Eukaryota	33208	Metazoa
8782	Aves	Eukaryota	33208	Metazoa
27929	Calcarea	Eukaryota	33208	Metazoa
28009	Choanoflagellata	Eukaryota	28009	Choanoflagellata
29178	Foraminifera	Eukaryota	543769	Rhizaria
29197	Chlorarachniophyceae	Eukaryota	543769	Rhizaria
29811	Ginkgoopsida	Eukaryota	35493	Streptophyta
33103	Ulvophyceae	Eukaryota	3041	Chlorophyta
33154	Opisthokonta	Eukaryota	33154	Opisthokonta
33829	Spirotrichea	Eukaryota	5878	Ciliophora
33836	Coscinodiscophyceae	Eukaryota	2696291	Ochrophyta
33849	Bacillariophyceae	Eukaryota	2696291	Ochrophyta
33853	Fragilariophyceae	Eukaryota	2696291	Ochrophyta
33859	Synurophyceae	Eukaryota	2696291	Ochrophyta
35675	Pelagophyceae	Eukaryota	2696291	Ochrophyta
37471	Phyllopharyngea	Eukaryota	5878	Ciliophora
38254	Glaucocystophyceae	Eukaryota	38254	Glaucocystophyceae
38410	Raphidophyceae	Eukaryota	2696291	Ochrophyta
39119	Dictyochophyceae	Eukaryota	2696291	Ochrophyta
40674	Mammalia	Eukaryota	33208	Metazoa
42113	Clitellata	Eukaryota	33208	Metazoa
50557	Insecta	Eukaryota	33208	Metazoa
58019	Pinopsida	Eukaryota	35493	Streptophyta
60882	Hexactinellida	Eukaryota	33208	Metazoa
65574	Acantharea	Eukaryota	543769	Rhizaria
65582	Polycystinea	Eukaryota	543769	Rhizaria
72037	Hexanauplia	Eukaryota	33208	Metazoa
75966	Trebouxiophyceae	Eukaryota	3041	Chlorophyta
80999	Homoscleromorpha	Eukaryota	33208	Metazoa
85705	Ancyromonadidae	Eukaryota	85705	Ancyromonadidae
91989	Bolidophyceae	Eukaryota	2696291	Ochrophyta
96475	Mesostigmatophyceae	Eukaryota	35493	Streptophyta
115361	Lingulata	Eukaryota	33208	Metazoa
117569	Hyperoartia	Eukaryota	33208	Metazoa
119089	Chromadorea	Eukaryota	33208	Metazoa
127916	Ichthyosporea	Eukaryota	127916	Ichthyosporea
131209	Zygnemophyceae	Eukaryota	35493	Streptophyta
131213	Chlorokybophyceae	Eukaryota	35493	Streptophyta
131220	Klebsormidiophyceae	Eukaryota	35493	Streptophyta
136087	Malawimonadidae	Eukaryota	136087	Malawimonadidae
136419	Cercozoa	Eukaryota	543769	Rhizaria
140493	Tentaculata	Eukaryota	33208	Metazoa
142796	Eumycetozoa	Eukaryota	554915	Amoebozoa
143015	Jakobidae	Eukaryota	556282	Jakobida
147541	Dothideomycetes	Eukaryota	4890	Ascomycota
147545	Eurotiomycetes	Eukaryota	4890	Ascomycota
147547	Lecanoromycetes	Eukaryota	4890	Ascomycota
147549	Pezizomycetes	Eukaryota	4890	Ascomycota
147550	Sordariomycetes	Eukaryota	4890	Ascomycota
147554	Schizosaccharomycetes	Eukaryota	4890	Ascomycota
147555	Taphrinomycetes	Eukaryota	4890	Ascomycota
147556	Neolectomycetes	Eukaryota	4890	Ascomycota
155616	Tremellomycetes	Eukaryota	5204	Basidiomycota
155619	Agaricomycetes	Eukaryota	5204	Basidiomycota
157124	Pinguiophyceae	Eukaryota	2696291	Ochrophyta
162481	Microbotryomycetes	Eukaryota	5204	Basidiomycota
172820	Apusomonadidae	Eukaryota	554296	Apusozoa
177937	Colpodellaceae	Eukaryota	877183	Colpodellida
186623	Actinopteri	Eukaryota	33208	Metazoa
186770	Marchantiopsida	Eukaryota	35493	Streptophyta
190322	Collodictyonidae	Eukaryota	2608240	CRuMs
191814	Diplonemea	Eukaryota	3035	Euglenida
193537	Centroplasthelida	Eukaryota	2608109	Haptista
194287	Heterotrichea	Eukaryota	5878	Ciliophora
207245	Fornicata	Eukaryota	2611341	Metamonada
214506	Glomeromycetes	Eukaryota	112252	Fungi incertae sedis
241806	Polypodiopsida	Eukaryota	35493	Streptophyta
304573	Coleochaetophyceae	Eukaryota	35493	Streptophyta
304574	Charophyceae	Eukaryota	35493	Streptophyta
402688	Anthocerotopsida	Eukaryota	35493	Streptophyta
419944	Picozoa	Eukaryota	419944	Eukaryota incertae sedis
422676	Aconoidasida	Eukaryota	5794	Apicomplexa
431957	Wallemiomycetes	Eukaryota	5204	Basidiomycota
432005	Cystobasidiomycetes	Eukaryota	5204	Basidiomycota
446134	Stylonematophyceae	Eukaryota	2797	Rhodophyta
451435	Chytridiomycetes	Eukaryota	112252	Fungi incertae sedis
451454	Monoblepharidomycetes	Eukaryota	112252	Fungi incertae sedis
451455	Neocallimastigomycetes	Eukaryota	112252	Fungi incertae sedis
451460	Blastocladiomycetes	Eukaryota	112252	Fungi incertae sedis
554915	Amoebozoa	Eukaryota	554915	Amoebozoa
555280	Discosea	Eukaryota	554915	Amoebozoa
556285	Histionidae	Eukaryota	556282	Jakobida
557229	Synchromophyceae	Eukaryota	2696291	Ochrophyta
589438	Telonemida	Eukaryota	2683617	Telonemida
589449	Mediophyceae	Eukaryota	2696291	Ochrophyta
658449	Armophorea	Eukaryota	5878	Ciliophora
661027	Rhodellophyceae	Eukaryota	2797	Rhodophyta
759891	Palpitomonas	Eukaryota	419944	Eukaryota incertae sedis
930023	Compsopogonophyceae	Eukaryota	2797	Rhodophyta
1004930	Thecofilosea	Eukaryota	543769	Rhizaria
1031332	Cryptomycota	Eukaryota	112252	Fungi incertae sedis
1035538	Mamiellophyceae	Eukaryota	3041	Chlorophyta
1084709	Tsukubamonadidae	Eukaryota	1084709	Tsukubamonadidae
1217819	Xylonomycetes	Eukaryota	4890	Ascomycota
1238961	Mantamonadidae	Eukaryota	2608240	CRuMs
1242998	Nephroselmidophyceae	Eukaryota	3041	Chlorophyta
1249559	Plagiopylea	Eukaryota	5878	Ciliophora
1280412	Conoidasida	Eukaryota	5794	Apicomplexa
1294546	Planomonadidae	Eukaryota	85705	Ancyromonadidae
1315720	Picomonadea	Eukaryota	419944	Eukaryota incertae sedis
1399768	Basidiobolomycetes	Eukaryota	112252	Fungi incertae sedis
1399770	Entomophthoromycetes	Eukaryota	112252	Fungi incertae sedis
1401294	Breviatea	Eukaryota	1401294	Breviatea
1485085	Flabellinia	Eukaryota	554915	Amoebozoa
1492816	Colponemidia	Eukaryota	1492816	Colponemidia
1498967	Aphelidea	Eukaryota	1498967	Aphelidea
1521260	Lycopodiopsida	Eukaryota	35493	Streptophyta
1524962	Chlorodendrophyceae	Eukaryota	3041	Chlorophyta
1538075	Malasseziomycetes	Eukaryota	5204	Basidiomycota
1736114	Imbricatea	Eukaryota	543769	Rhizaria
1871466	Ascetosporea	Eukaryota	543769	Rhizaria
2201463	Palmophyllophyceae	Eukaryota	3041	Chlorophyta
2212703	Mucoromycetes	Eukaryota	112252	Fungi incertae sedis
2212732	Mortierellomycetes	Eukaryota	112252	Fungi incertae sedis
2219690	Kickxellomycetes	Eukaryota	112252	Fungi incertae sedis
2219692	Dimargaritomycetes	Eukaryota	112252	Fungi incertae sedis
2219693	Harpellomycetes	Eukaryota	112252	Fungi incertae sedis
2233521	Zoopagomycetes	Eukaryota	112252	Fungi incertae sedis
2302911	Chloropicophyceae	Eukaryota	3041	Chlorophyta
2316402	Fonticulaceae	Eukaryota	2316402	Fonticulaceae
2489521	Hemimastigophora	Eukaryota	2489521	Hemimastigophora
2497438	Perkinsozoa	Eukaryota	2497438	Perkinsozoa
2598132	Rhodelphea	Eukaryota	2598132	Rhodelphea
2604748	Endomyxa	Eukaryota	543769	Rhizaria
2605334	Variosea	Eukaryota	554915	Amoebozoa
2605435	Evosea	Eukaryota	554915	Amoebozoa
2605696	Vitrellaceae	Eukaryota	877183	Colpodellida
2605701	Chromeraceae	Eukaryota	877183	Colpodellida
2605703	Alphamonaceae	Eukaryota	877183	Colpodellida
2608240	CRuMs	Eukaryota	2608240	CRuMs
2611341	Metamonada	Eukaryota	2611341	Metamonada
2662611	Preaxostyla	Eukaryota	2611341	Metamonada
2681631	Echinamoebida	Eukaryota	554915	Amoebozoa
2681632	Elardia	Eukaryota	554915	Amoebozoa
2682552	Leptocardii	Eukaryota	33208	Metazoa
2683624	Andaluciidae	Eukaryota	556282	Jakobida
2683625	Stygiellidae	Eukaryota	556282	Jakobida
2683628	Bigyra	Eukaryota	2683628	Bigyra
2686027	Ancyromonadida	Eukaryota	85705	Ancyromonadidae
2687318	Filasterea	Eukaryota	2687318	Filasterea
2692249	Picocystophyceae	Eukaryota	3041	Chlorophyta
2698737	Sar	Eukaryota	2698737	Sar
2704063	Pyramimonadophyceae	Eukaryota	3041	Chlorophyta
2730722	Muranotrichea	Eukaryota	5878	Ciliophora
2779609	Phytomyxea	Eukaryota	543769	Rhizaria
2806170	Prasinodermophyceae	Eukaryota	2806170	Prasinodermophyceae
2871091	Sanchytriomycetes	Eukaryota	112252	Fungi incertae sedis
2990458	Marosporida	Eukaryota	5794	Apicomplexa
3004450	Nebulidea	Eukaryota	3004450	Nebulidea
3043701	Uniplacotomia	Eukaryota	33208	Metazoa

## Sheet: Fe-S assembly genes
Representative Gene Name	Representative Uniprot Acc	All Uniprot Gene Names	Uniprot Protein Name	KOG equivalent	KEGG Representative Sequence	Comment
ISCU1	Q03020	ISU1, NUA1, YPL135W	Iron sulfur cluster assembly protein 1, mitochondrial	K22068	sce:YPL135W
ISCU2	Q12056	ISU2, NUA2, YOR226C	Iron sulfur cluster assembly protein 2, mitochondrial	K22068	sce:YOR226C
NFS1	Q9Y697	NFS1, NIFS, HUSSY-08	Cysteine desulfurase	K04487	hsa:9054
ISD11	Q9HD34	LYRM4, C6orf149, ISD11, CGI-203	LYR motif-containing protein 4	K22069	hsa:57128	Not detected in EPOCs
ACPM	O14561	ACPM	Acyl carrier protein, mitochondrial	K03955	hsa:4706	Not detected in EPOCs
Ferredoxin	Q6P4F2	FDX2, FDX1L	Ferredoxin-2, mitochondrial	K22071	hsa:112812
HSPA9	P38646	HSPA9	Stress-70 protein, mitochondrial	K04043	hsa:3313	Not detected in EPOCs
HSC20	Q8IWL3	HSCB, DNAJC20, HSC20	Iron-sulfur cluster co-chaperone protein HscB	K04082	hsa:150274	Not detected in EPOCs
GLRX5	Q86SX6	GLRX5, C14orf87	Glutaredoxin-related protein 5, mitochondrial	K07390	hsa:51218	Not detected in EPOCs
GRPE	Q9HAV7	GRPEL1, GREPEL1	GrpE protein homolog, mitochondrial	K03687
ABCB7	O75027	ABCB7, ABC7	Iron-sulfur clusters transporter ABCB7, mitochondrial	K05662	hsa:22
ALR	P55789	GFER, ALR, HERV1, HPO	FAD-linked sulfhydryl oxidase ALR	K17783	hsa:2671	Not detected in EPOCs
ISCA1	Q9BUE6	ISCA1, HBLD2, GK004	Iron-sulfur cluster assembly 1 homolog, mitochondrial	K22063	hsa:81689
ISCA2	Q86U28	ISCA2, HBLD1	Iron-sulfur cluster assembly 2 homolog, mitochondrial	K22072	hsa:122961
IBA57	Q5T440	IBA57, C1orf69	Putative transferase CAF17, mitochondrial	K22073	hsa:200205
NFU1	Q9UMS0	NFU1, HIRIP5, CGI-33	NFU1 iron-sulfur cluster scaffold homolog, mitochondrial	K22074	hsa:27247	Not detected in EPOCs
BOLA1	Q9Y3E2	BOLA1, CGI-143	BolA-like protein 1	K22066
BOLA3	Q53S33	BOLA3	BolA-like protein 3	K22075
CFD1	P40558	CFD1, DRE3, RIX19, YIL003W, YIA3W	Cytosolic Fe-S cluster assembly factor CFD1	none	sce:YIL003W
NBP35	P53384	NUBP1, NBP, NBP1	Cytosolic Fe-S cluster assembly factor NUBP1	K03593	hsa:4682	Closest match by KEGG orthology
CIAPIN1	Q6FI81	CIAPIN1, CUA001, PRO0915	Anamorsin	K22746	hsa:57019	Not detected in EPOCs
NDOR1	Q9UHB4	NDOR1, NR1	NADPH-dependent diflavin oxidoreductase 1	none	hsa:27158
IOP1	Q9H6Q4	CIAO3, NARFL, PRN	Cytosolic iron-sulfur assembly component 3	K26404	hsa:64428
CIA1	O76071	CIAO1, CIA1, WDR39	Probable cytosolic iron-sulfur protein assembly protein CIAO1	K24730	hsa:9391
CIA2B	Q9Y3D0	CIAO2B, CIAB, FAM96B, MIP18, CGI-128, HSPC118	Cytosolic iron-sulfur assembly component 2B	K26403	hsa:51647
MMS19	Q96T76	MMS19, MMS19L	MMS19 nucleotide excision repair protein homolog	K15075	hsa:64210	Not detected in EPOCs
CIA2A	Q9H5X1	CIAO2A, CIA2A, FAM96A	Cytosolic iron-sulfur assembly component 2A	K26403	hsa:84191

## Sheet: Notable Bacterial and Myxococco
Strong Myxococcota associations
KOG	Gene Name	Description	EC number(s)
K10807	RRM1	ribonucleoside-diphosphate reductase subunit M1	1.17.4.1
K01517	ADPRM	manganese-dependent ADP-ribose/CDP-alcohol diphosphatase	3.6.1.13, 3.6.1.16, 3.6.1.53
K01081	E3.1.3.5	5'-nucleotidase	3.1.3.5
K01119	cpdB	2',3'-cyclic-nucleotide 2'-phosphodiesterase / 3'-nucleotidase	3.1.4.16, 3.1.3.6
K19970	NT5E, CD73	5'-nucleotidase	3.1.3.5
K03742	pncC	nicotinamide-nucleotide amidase	3.5.1.42
K03462	NAMPT	nicotinamide phosphoribosyltransferase	2.4.2.12
K11751	ushA	5'-nucleotidase / UDP-sugar diphosphatase	3.1.3.5, 3.6.1.45
K01525	apaH	bis(5'-nucleosyl)-tetraphosphatase (symmetrical)	3.6.1.41
K03651	cpdA	3',5'-cyclic-AMP phosphodiesterase	3.1.4.53
K12410	cobB, srtN, npdA	NAD-dependent protein deacetylase/lipoamidase	2.3.1.286, 2.3.1.313
Strong assocations with diverse bacteria 2311 pangenome
KOG	Gene Name	Description	EC number(s)
K02564	nagB, GNPDA	glucosamine-6-phosphate deaminase	EC:3.5.99.6
K12862	PLRG1, PRL1, PRP46	pleiotropic regulator 1
K07198	PRKAA, AMPK	5'-AMP-activated protein kinase, catalytic alpha subunit	EC:2.7.11.31
K10570	ERCC8, CKN1, CSA	DNA excision repair protein ERCC-8
K06972	PITRM1, PreP, CYM1	presequence protease	EC:3.4.24.-
K05967	K05967	uncharacterized protein
K03781	katE, CAT, catB, srpA	catalase	EC:1.11.1.6
K04688	RPS6KB	ribosomal protein S6 kinase beta	EC:2.7.11.1
K01908	ACSS3, prpE	propionyl-CoA synthetase	EC:6.2.1.17
K13137	STRAP, UNRIP	serine-threonine kinase receptor-associated protein
K06013	STE24	STE24 endopeptidase	EC:3.4.24.84
K14085	ALDH7A1	aldehyde dehydrogenase family 7 member A1	EC:1.2.1.31, 1.2.1.8, 1.2.1.3
K00597	MTRR	methionine synthase reductase	EC:1.16.1.8
K00023	phbB	acetoacetyl-CoA reductase	EC:1.1.1.36
K14430	PHO87_91	phosphate transporter
K08956	AFG3	AFG3 family protein	EC:3.4.24.-
K00261	GLUD1_2, gdhA	glutamate dehydrogenase (NAD(P)+)	EC:1.4.1.3

## Sheet: Sheet1
Annotation				aELW values for taxa in across map
Map ID	Map Name	Total EPOCs for Map	Total KOGs in Map	Asgard	Gammaproteobacteria	Alphaproteobacteria	Bacillota	Actinomycetota	Cyanobacteriota	Deltaproteobacteria	FCB group	Betaproteobacteria	PVC group	Acidobacteriota	Chlamydiia	Bdellovibrionota	Myxococcota	Spirochaetota	Thermotogae	Campylobacterota	Thermodesulfobacteriota	Thermoplasmata	Euryarchaeota	Deinococcota	TACK group	Mycoplasmatota	Chloroflexota	Nitrospirota	DPANN group
map00010	Glycolysis / Gluconeogenesis	68	28	0.465	0.107	0.037	0.038	0.083	0.03	0.052	0.05	0.014	0.01	0	0.009	0	0	0.066	0	0	0.031	0	0.009	0	0	0	0	0	0
map00020	Citrate cycle (TCA cycle)	39	21	0.616	0.076	0.012	0	0.033	0	0.081	0	0.025	0	0	0.012	0	0	0	0.018	0.015	0.069	0	0	0.012	0.011	0	0.021	0	0
map00030	Pentose phosphate pathway	27	17	0.367	0	0.067	0.073	0.101	0.023	0	0	0	0	0	0.028	0	0	0.198	0	0	0.069	0	0.027	0.047	0	0	0	0	0
map00040	Pentose and glucuronate interconversions	37	21	0.658	0	0.032	0	0.115	0.022	0.018	0.018	0.076	0	0	0.03	0	0.03	0	0	0	0	0	0	0	0	0	0	0	0
map00051	Fructose and mannose metabolism	33	17	0.609	0	0	0.047	0	0	0	0	0.114	0.015	0	0.019	0	0	0.135	0	0	0.047	0	0	0.013	0	0	0	0	0
map00052	Galactose metabolism	49	19	0.501	0.018	0	0.022	0.095	0.062	0.011	0	0.039	0.036	0	0.022	0	0.022	0.08	0	0	0.031	0	0.012	0.048	0	0	0	0	0
map00053	Ascorbate and aldarate metabolism	31	14	0.432	0.018	0.102	0	0.108	0.016	0.022	0.027	0.089	0	0	0.036	0	0.054	0	0	0	0	0	0	0.095	0	0	0	0	0
map00061	Fatty acid biosynthesis	41	10	0.704	0.01	0.039	0.018	0.136	0	0	0.014	0	0	0	0	0	0	0	0	0	0.061	0	0.017	0	0	0	0	0	0
map00062	Fatty acid elongation	15	7	0.642	0.129	0.034	0	0.08	0	0	0	0.069	0	0	0	0	0.047	0	0	0	0	0	0	0	0	0	0	0	0
map00071	Fatty acid degradation	53	20	0.646	0.04	0.063	0.008	0.13	0	0	0.044	0.009	0	0	0	0	0	0	0	0	0.047	0	0.013	0	0	0	0	0	0
map00073	Cutin, suberine and wax biosynthesis	1	1	0	0	0	0	0	0	0	0	0	0	0	0	0	0	0	0	1	0	0	0	0	0	0	0	0	0
map00100	Steroid biosynthesis	10	5	0.539	0	0.145	0	0.102	0.045	0	0	0	0	0	0	0	0.17	0	0	0	0	0	0	0	0	0	0	0	0
map00120	Primary bile acid biosynthesis	5	3	0.35	0	0.076	0	0.574	0	0	0	0	0	0	0	0	0	0	0	0	0	0	0	0	0	0	0	0	0
map00121	Secondary bile acid biosynthesis	2	1	0	0	0	0	0	1	0	0	0	0	0	0	0	0	0	0	0	0	0	0	0	0	0	0	0	0
map00130	Ubiquinone and other terpenoid-quinone biosynthesis	18	12	0.509	0	0.092	0	0	0.118	0	0.037	0.04	0	0	0	0	0.139	0	0.038	0	0	0	0	0	0.026	0	0	0	0
map00140	Steroid hormone biosynthesis	10	5	0.964	0	0	0	0	0	0	0	0.036	0	0	0	0	0	0	0	0	0	0	0	0	0	0	0	0	0
map00190	Oxidative phosphorylation	73	39	0.535	0	0.267	0	0.039	0.014	0	0	0.04	0.011	0	0.023	0.009	0.018	0	0	0.014	0.008	0	0.007	0.013	0	0	0	0	0
map00195	Photosynthesis	8	7	0.354	0	0.204	0	0	0.381	0	0	0	0	0	0	0	0	0	0	0	0	0	0	0	0	0	0.061	0	0
map00196	Photosynthesis - antenna proteins	3	2	0.625	0	0	0	0	0.375	0	0	0	0	0	0	0	0	0	0	0	0	0	0	0	0	0	0	0	0
map00220	Arginine biosynthesis	24	16	0.414	0.057	0.088	0.089	0.095	0.045	0	0.068	0.024	0	0.048	0	0	0.025	0	0.024	0	0	0	0	0	0	0.024	0	0	0
map00230	Purine metabolism	108	42	0.475	0.033	0.033	0.014	0.081	0.034	0.006	0.006	0.037	0.018	0	0.006	0	0.127	0.007	0.019	0.016	0.031	0	0.007	0.032	0	0.012	0.005	0	0
map00232	Caffeine metabolism	2	1	0.487	0	0	0	0	0	0	0	0.513	0	0	0	0	0	0	0	0	0	0	0	0	0	0	0	0	0
map00240	Pyrimidine metabolism	59	32	0.424	0.031	0.027	0.032	0.073	0.031	0	0.034	0.01	0	0	0	0	0.159	0.01	0.026	0.028	0.044	0	0	0.016	0.01	0.01	0.036	0	0
map00250	Alanine, aspartate and glutamate metabolism	48	26	0.536	0.069	0.055	0.045	0.057	0.035	0	0.068	0	0.01	0.02	0	0	0.012	0.011	0	0	0	0.012	0.061	0	0.01	0	0	0	0
map00253	Tetracycline biosynthesis	0	0	0	0	0	0	0	0	0	0	0	0	0	0	0	0	0	0	0	0	0	0	0	0	0	0	0	0
map00254	Aflatoxin biosynthesis	2	2	0.588	0	0	0	0	0	0	0	0.412	0	0	0	0	0	0	0	0	0	0	0	0	0	0	0	0	0
map00260	Glycine, serine and threonine metabolism	78	42	0.458	0.068	0.115	0.027	0.117	0.05	0.008	0.012	0.062	0.007	0.008	0	0.007	0.023	0	0	0	0	0	0.006	0	0	0	0.02	0.013	0
map00261	Monobactam biosynthesis	3	3	0	0	0	0	0.289	0	0	0	0	0	0	0	0	0	0	0.236	0	0.261	0	0.214	0	0	0	0	0	0
map00270	Cysteine and methionine metabolism	77	34	0.504	0.064	0.013	0.014	0.112	0.007	0.034	0.044	0.028	0.024	0	0	0	0.033	0	0.007	0.018	0	0.006	0.037	0.008	0.013	0.021	0	0.012	0
map00280	Valine, leucine and isoleucine degradation	54	34	0.578	0.058	0.167	0.019	0.047	0	0	0.094	0.01	0.009	0	0.01	0	0.01	0	0	0	0	0	0	0	0	0	0	0	0
map00290	Valine, leucine and isoleucine biosynthesis	24	11	0.313	0	0.215	0.075	0.045	0.027	0.024	0.108	0.02	0.115	0	0.023	0	0	0	0	0	0	0.036	0	0	0	0	0	0	0
map00300	Lysine biosynthesis	14	9	0.779	0	0	0	0	0.064	0	0	0	0	0	0	0	0.085	0	0	0	0.037	0	0.035	0	0	0	0	0	0
map00310	Lysine degradation	29	18	0.665	0.078	0.073	0.032	0.07	0	0	0.064	0.018	0	0	0	0	0	0	0	0	0	0	0	0	0	0	0	0	0
map00311	Penicillin and cephalosporin biosynthesis	10	4	0.861	0.055	0	0	0	0	0	0	0	0	0	0	0	0	0	0	0	0	0	0	0.083	0	0	0	0	0
map00330	Arginine and proline metabolism	35	23	0.201	0.088	0.108	0.041	0.058	0.122	0.02	0.052	0	0.016	0.025	0	0	0.039	0.103	0.019	0.057	0	0	0	0	0.033	0.019	0	0	0
map00331	Clavulanic acid biosynthesis	0	0	0	0	0	0	0	0	0	0	0	0	0	0	0	0	0	0	0	0	0	0	0	0	0	0	0	0
map00332	Carbapenem biosynthesis	8	4	0.337	0	0	0	0	0.196	0	0	0	0	0	0	0	0	0.327	0	0.14	0	0	0	0	0	0	0	0	0
map00333	Prodigiosin biosynthesis	6	3	0.584	0	0	0	0	0.271	0	0	0	0	0	0	0	0.145	0	0	0	0	0	0	0	0	0	0	0	0
map00340	Histidine metabolism	25	19	0.249	0	0.031	0.049	0.041	0.024	0	0.073	0.136	0.168	0.172	0	0	0	0	0	0.026	0	0	0.032	0	0	0	0	0	0
map00350	Tyrosine metabolism	13	10	0.579	0.095	0.121	0	0.107	0.098	0	0	0	0	0	0	0	0	0	0	0	0	0	0	0	0	0	0	0	0
map00360	Phenylalanine metabolism	22	15	0.401	0.028	0.13	0	0	0.045	0.071	0	0.091	0	0	0	0.071	0	0	0	0.095	0.02	0	0	0.047	0	0	0	0	0
map00380	Tryptophan metabolism	32	19	0.502	0.063	0.1	0	0.029	0.017	0.019	0.08	0.095	0	0.026	0	0.019	0	0	0	0	0	0	0	0.052	0	0	0	0	0
map00400	Phenylalanine, tyrosine and tryptophan biosynthesis	11	10	0.576	0	0.052	0	0	0.081	0	0	0	0	0.055	0	0	0	0	0	0	0	0	0.129	0	0	0	0.107	0	0
map00401	Novobiocin biosynthesis	2	2	1	0	0	0	0	0	0	0	0	0	0	0	0	0	0	0	0	0	0	0	0	0	0	0	0	0
map00402	Benzoxazinoid biosynthesis	0	0	0	0	0	0	0	0	0	0	0	0	0	0	0	0	0	0	0	0	0	0	0	0	0	0	0	0
map00403	Indole diterpene alkaloid biosynthesis	0	0	0	0	0	0	0	0	0	0	0	0	0	0	0	0	0	0	0	0	0	0	0	0	0	0	0	0
map00404	Staurosporine biosynthesis	1	1	0	0	0	0	0	0	0	0	0	0	0	0	0	0	0	0	0	0	0	0	0	1	0	0	0	0
map00405	Phenazine biosynthesis	7	4	0.477	0	0	0	0.159	0	0	0	0	0	0	0	0	0.153	0	0	0	0	0	0.08	0	0	0	0.132	0	0
map00410	beta-Alanine metabolism	24	15	0.465	0.108	0.16	0	0.127	0	0	0.038	0.025	0	0.034	0	0	0.02	0	0	0	0	0	0	0	0.023	0	0	0	0
map00430	Taurine and hypotaurine metabolism	11	7	0.422	0.158	0.155	0	0.058	0.054	0	0	0.098	0	0	0	0	0	0	0	0	0.054	0	0	0	0	0	0	0	0
map00440	Phosphonate and phosphinate metabolism	9	4	0.828	0	0.086	0	0	0	0	0	0	0	0	0	0	0	0	0.085	0	0	0	0	0	0	0	0	0	0
map00450	Selenocompound metabolism	25	14	0.749	0	0	0.02	0.067	0.02	0.059	0	0	0	0	0	0	0	0	0	0.023	0.02	0	0.042	0	0	0	0	0	0
map00460	Cyanoamino acid metabolism	16	7	0.257	0.107	0.056	0	0.209	0.088	0	0.047	0.066	0.051	0.08	0	0.039	0	0	0	0	0	0	0	0	0	0	0	0	0
map00470	D-Amino acid metabolism	12	8	0.396	0	0.292	0	0.216	0	0	0.047	0	0	0	0	0	0.05	0	0	0	0	0	0	0	0	0	0	0	0
map00480	Glutathione metabolism	42	19	0.221	0.191	0.272	0.017	0.014	0.045	0.013	0	0.109	0	0	0	0	0	0	0	0.061	0.013	0	0	0	0.043	0	0	0	0
map00500	Starch and sucrose metabolism	47	22	0.461	0.074	0.022	0.064	0.13	0.036	0	0.056	0.043	0	0	0	0.011	0.013	0.013	0	0	0.022	0	0.015	0.04	0	0	0	0	0
map00510	N-Glycan biosynthesis	30	17	0.875	0	0	0	0	0	0	0.017	0	0.017	0	0	0	0	0.035	0	0	0	0	0	0.056	0	0	0	0	0
map00511	Other glycan degradation	43	9	0.805	0	0	0	0	0.096	0	0	0	0	0.053	0	0	0	0	0.014	0	0	0	0	0	0	0	0.032	0	0
map00512	Mucin type O-glycan biosynthesis	0	0	0	0	0	0	0	0	0	0	0	0	0	0	0	0	0	0	0	0	0	0	0	0	0	0	0	0
map00513	Various types of N-glycan biosynthesis	26	12	0.982	0	0	0	0	0	0	0.018	0	0	0	0	0	0	0	0	0	0	0	0	0	0	0	0	0	0
map00514	Other types of O-glycan biosynthesis	4	1	0.504	0	0	0	0	0.124	0	0.243	0.129	0	0	0	0	0	0	0	0	0	0	0	0	0	0	0	0	0
map00515	Mannose type O-glycan biosynthesis	0	0	0	0	0	0	0	0	0	0	0	0	0	0	0	0	0	0	0	0	0	0	0	0	0	0	0	0
map00520	Amino sugar and nucleotide sugar metabolism	79	39	0.595	0.012	0.011	0.025	0.12	0.043	0.016	0.006	0.014	0.015	0.008	0.043	0	0.041	0	0.02	0	0	0	0.008	0.017	0	0	0.007	0	0
map00521	Streptomycin biosynthesis	14	7	0.553	0.058	0	0.033	0.113	0.112	0.049	0	0.03	0	0.053	0	0	0	0	0	0	0	0	0	0	0	0	0	0	0
map00522	Biosynthesis of 12-, 14- and 16-membered macrolides	0	0	0	0	0	0	0	0	0	0	0	0	0	0	0	0	0	0	0	0	0	0	0	0	0	0	0	0
map00523	Polyketide sugar unit biosynthesis	7	2	0.924	0	0	0	0	0.076	0	0	0	0	0	0	0	0	0	0	0	0	0	0	0	0	0	0	0	0
map00524	Neomycin, kanamycin and gentamicin biosynthesis	3	2	0	0.282	0	0	0.246	0.325	0	0	0.147	0	0	0	0	0	0	0	0	0	0	0	0	0	0	0	0	0
map00525	Acarbose and validamycin biosynthesis	3	1	1	0	0	0	0	0	0	0	0	0	0	0	0	0	0	0	0	0	0	0	0	0	0	0	0	0
map00531	Glycosaminoglycan degradation	23	8	0.879	0	0	0	0	0	0	0	0	0.072	0.049	0	0	0	0	0	0	0	0	0	0	0	0	0	0	0
map00532	Glycosaminoglycan biosynthesis - chondroitin sulfate / dermatan sulfate	0	0	0	0	0	0	0	0	0	0	0	0	0	0	0	0	0	0	0	0	0	0	0	0	0	0	0	0
map00533	Glycosaminoglycan biosynthesis - keratan sulfate	1	1	1	0	0	0	0	0	0	0	0	0	0	0	0	0	0	0	0	0	0	0	0	0	0	0	0	0
map00534	Glycosaminoglycan biosynthesis - heparan sulfate / heparin	5	2	1	0	0	0	0	0	0	0	0	0	0	0	0	0	0	0	0	0	0	0	0	0	0	0	0	0
map00540	Lipopolysaccharide biosynthesis	8	5	0.763	0	0	0	0	0.067	0	0	0	0	0	0.108	0	0	0	0.061	0	0	0	0	0	0	0	0	0	0
map00541	O-Antigen nucleotide sugar biosynthesis	32	14	0.736	0	0	0	0.154	0.05	0.019	0	0.018	0	0	0	0	0	0	0	0	0	0	0	0.023	0	0	0	0	0
map00542	O-Antigen repeat unit biosynthesis	0	0	0	0	0	0	0	0	0	0	0	0	0	0	0	0	0	0	0	0	0	0	0	0	0	0	0	0
map00543	Exopolysaccharide biosynthesis	13	6	0.8	0	0	0	0	0	0	0.039	0	0	0.043	0	0	0.043	0	0.039	0.035	0	0	0	0	0	0	0	0	0
map00550	Peptidoglycan biosynthesis	12	3	0.634	0	0	0	0.102	0.085	0	0	0	0	0	0	0	0.102	0	0.077	0	0	0	0	0	0	0	0	0	0
map00552	Teichoic acid biosynthesis	5	2	0.886	0	0.114	0	0	0	0	0	0	0	0	0	0	0	0	0	0	0	0	0	0	0	0	0	0	0
map00561	Glycerolipid metabolism	46	18	0.538	0	0.019	0.013	0.036	0.167	0	0.018	0.044	0	0.012	0	0.024	0.12	0.01	0	0	0	0	0	0	0	0	0	0	0
map00562	Inositol phosphate metabolism	13	8	0.261	0	0	0.046	0.087	0.127	0.068	0.048	0	0	0.074	0	0.048	0.178	0	0	0	0	0	0	0	0	0	0.064	0	0
map00563	Glycosylphosphatidylinositol (GPI)-anchor biosynthesis	14	8	1	0	0	0	0	0	0	0	0	0	0	0	0	0	0	0	0	0	0	0	0	0	0	0	0	0
map00564	Glycerophospholipid metabolism	56	28	0.539	0.011	0.065	0.009	0.009	0.051	0.009	0	0.11	0.022	0	0	0.022	0.07	0.009	0	0.02	0	0	0	0	0	0.043	0.011	0	0
map00565	Ether lipid metabolism	20	9	0.467	0	0.103	0	0.057	0.029	0.085	0	0.069	0	0	0	0	0.108	0	0	0.024	0	0	0	0.058	0	0	0	0	0
map00571	Lipoarabinomannan (LAM) biosynthesis	5	1	0.886	0	0	0	0	0	0	0.114	0	0	0	0	0	0	0	0	0	0	0	0	0	0	0	0	0	0
map00572	Arabinogalactan biosynthesis - Mycobacterium	2	2	0.625	0	0	0	0	0	0	0	0	0	0	0	0	0	0	0	0	0	0.375	0	0	0	0	0	0	0
map00590	Arachidonic acid metabolism	26	8	0.334	0.177	0.199	0	0	0.082	0	0	0.209	0	0	0	0	0	0	0	0	0	0	0	0	0	0	0	0	0
map00591	Linoleic acid metabolism	1	1	0	0	1	0	0	0	0	0	0	0	0	0	0	0	0	0	0	0	0	0	0	0	0	0	0	0
map00592	alpha-Linolenic acid metabolism	8	6	0.335	0	0.211	0.071	0.313	0	0.07	0	0	0	0	0	0	0	0	0	0	0	0	0	0	0	0	0	0	0
map00600	Sphingolipid metabolism	36	12	0.802	0	0.026	0	0.011	0.072	0	0.05	0.013	0	0	0	0.026	0	0	0	0	0	0	0	0	0	0	0	0	0
map00601	Glycosphingolipid biosynthesis - lacto and neolacto series	0	0	0	0	0	0	0	0	0	0	0	0	0	0	0	0	0	0	0	0	0	0	0	0	0	0	0	0
map00603	Glycosphingolipid biosynthesis - globo and isoglobo series	9	2	1	0	0	0	0	0	0	0	0	0	0	0	0	0	0	0	0	0	0	0	0	0	0	0	0	0
map00604	Glycosphingolipid biosynthesis - ganglio series	11	2	0.895	0	0	0	0	0	0	0	0.105	0	0	0	0	0	0	0	0	0	0	0	0	0	0	0	0	0
map00620	Pyruvate metabolism	84	35	0.499	0.088	0.068	0.015	0.109	0.016	0.044	0.055	0.035	0	0	0	0	0.006	0.006	0.01	0	0.038	0	0.006	0	0	0	0.007	0	0
map00630	Glyoxylate and dicarboxylate metabolism	62	32	0.401	0.027	0.144	0.014	0.14	0.05	0	0.09	0.037	0	0	0	0.009	0.035	0	0	0	0.009	0	0	0.017	0	0	0.025	0	0
map00640	Propanoate metabolism	55	33	0.526	0.06	0.149	0.014	0.106	0.01	0	0.096	0.021	0.008	0	0	0	0	0	0	0	0.01	0	0	0	0	0	0	0	0
map00650	Butanoate metabolism	36	27	0.709	0.066	0.066	0	0.055	0.013	0	0.06	0.015	0	0	0	0	0.015	0	0	0	0	0	0	0	0	0	0	0	0
map00660	C5-Branched dibasic acid metabolism	12	7	0.76	0	0.095	0.033	0	0	0	0	0	0.044	0	0	0	0	0	0	0	0	0	0	0.068	0	0	0	0	0
map00670	One carbon pool by folate	14	9	0.306	0	0.041	0	0.092	0.069	0.138	0	0	0	0	0	0	0	0	0	0.091	0	0	0	0	0	0	0.263	0	0
map00680	Methane metabolism	54	27	0.505	0.051	0.057	0.05	0.109	0.01	0	0.051	0.015	0.01	0	0	0	0.01	0.08	0	0	0.042	0	0	0	0	0	0.011	0	0
map00710	Carbon fixation in photosynthetic organisms	16	10	0.565	0.043	0.035	0.032	0.124	0	0.201	0	0	0	0	0	0	0	0	0	0	0	0	0	0	0	0	0	0	0
map00720	Carbon fixation pathways in prokaryotes	53	30	0.554	0.049	0.072	0.014	0.028	0	0	0.092	0	0	0	0	0	0	0	0.014	0.019	0.062	0	0	0	0.008	0	0.069	0.019	0
map00730	Thiamine metabolism	16	9	0.443	0	0	0	0	0.109	0	0	0	0	0	0.13	0	0	0	0.028	0	0.055	0	0.055	0.124	0	0	0.057	0	0
map00740	Riboflavin metabolism	28	15	0.321	0.218	0.075	0	0.095	0.063	0	0	0	0	0	0	0	0.025	0	0	0	0.042	0	0.072	0.09	0	0	0	0	0
map00750	Vitamin B6 metabolism	7	5	0.393	0	0	0	0.231	0.252	0	0	0.125	0	0	0	0	0	0	0	0	0	0	0	0	0	0	0	0	0
map00760	Nicotinate and nicotinamide metabolism	51	25	0.329	0.025	0.075	0	0.115	0	0	0.024	0.012	0	0	0	0	0.239	0.047	0	0	0.04	0	0.062	0.02	0	0	0.011	0	0
map00770	Pantothenate and CoA biosynthesis	27	16	0.362	0.018	0.084	0.03	0.071	0	0	0.166	0	0.225	0	0	0	0.026	0	0	0	0	0	0	0	0.019	0	0	0	0
map00780	Biotin metabolism	10	7	0.629	0.073	0.064	0	0	0	0	0	0	0	0	0.101	0	0.085	0	0	0.048	0	0	0	0	0	0	0	0	0
map00785	Lipoic acid metabolism	18	8	0.626	0.064	0.024	0	0.103	0.04	0	0	0	0.023	0	0	0.026	0	0	0	0	0	0	0	0	0	0.094	0	0	0
map00790	Folate biosynthesis	53	27	0.447	0.013	0.012	0.012	0.061	0.05	0.011	0.012	0.063	0.028	0	0	0	0.023	0	0.011	0.014	0.051	0.012	0.046	0.06	0.01	0	0.066	0	0
map00830	Retinol metabolism	12	5	0.73	0	0	0	0.232	0	0	0	0	0	0	0	0	0.039	0	0	0	0	0	0	0	0	0	0	0	0
map00860	Porphyrin metabolism	44	27	0.447	0.027	0.036	0	0	0.179	0	0.052	0.11	0	0.022	0.014	0.026	0	0	0	0.025	0	0	0.013	0	0.014	0	0.036	0	0
map00900	Terpenoid backbone biosynthesis	41	17	0.549	0.012	0.016	0.013	0.013	0.035	0.091	0.029	0.081	0	0	0	0.017	0.017	0.017	0	0	0.065	0	0.017	0	0.013	0	0	0.015	0
map00901	Indole alkaloid biosynthesis	0	0	0	0	0	0	0	0	0	0	0	0	0	0	0	0	0	0	0	0	0	0	0	0	0	0	0	0
map00902	Monoterpenoid biosynthesis	0	0	0	0	0	0	0	0	0	0	0	0	0	0	0	0	0	0	0	0	0	0	0	0	0	0	0	0
map00903	Limonene degradation	10	2	0.803	0	0	0	0	0.197	0	0	0	0	0	0	0	0	0	0	0	0	0	0	0	0	0	0	0	0
map00904	Diterpenoid biosynthesis	6	3	0	0	0	0	0	0	0	0	0	0	0	0	0	1	0	0	0	0	0	0	0	0	0	0	0	0
map00905	Brassinosteroid biosynthesis	0	0	0	0	0	0	0	0	0	0	0	0	0	0	0	0	0	0	0	0	0	0	0	0	0	0	0	0
map00906	Carotenoid biosynthesis	10	7	0.315	0	0.061	0	0.091	0.344	0	0	0	0	0	0	0	0.188	0	0	0	0	0	0	0	0	0	0	0	0
map00907	Pinene, camphor and geraniol degradation	8	5	0.672	0	0.245	0	0.083	0	0	0	0	0	0	0	0	0	0	0	0	0	0	0	0	0	0	0	0	0
map00908	Zeatin biosynthesis	0	0	0	0	0	0	0	0	0	0	0	0	0	0	0	0	0	0	0	0	0	0	0	0	0	0	0	0
map00909	Sesquiterpenoid and triterpenoid biosynthesis	0	0	0	0	0	0	0	0	0	0	0	0	0	0	0	0	0	0	0	0	0	0	0	0	0	0	0	0
map00910	Nitrogen metabolism	17	11	0.344	0.055	0.097	0	0	0.057	0	0.08	0.101	0.038	0	0.059	0	0	0	0	0.17	0	0	0	0	0	0	0	0	0
map00920	Sulfur metabolism	29	16	0.471	0.033	0	0.036	0.113	0.135	0	0.063	0.04	0	0.022	0	0	0.026	0	0.019	0	0.019	0	0	0.024	0	0	0	0	0
map00940	Phenylpropanoid biosynthesis	20	5	0.54	0	0.036	0	0.203	0.045	0	0.025	0.072	0	0	0	0.028	0.025	0	0	0.025	0	0	0	0	0	0	0	0	0
map00941	Flavonoid biosynthesis	4	2	0.655	0	0	0	0	0	0	0	0	0	0	0.213	0	0.131	0	0	0	0	0	0	0	0	0	0	0	0
map00942	Anthocyanin biosynthesis	0	0	0	0	0	0	0	0	0	0	0	0	0	0	0	0	0	0	0	0	0	0	0	0	0	0	0	0
map00943	Isoflavonoid biosynthesis	1	1	1	0	0	0	0	0	0	0	0	0	0	0	0	0	0	0	0	0	0	0	0	0	0	0	0	0
map00944	Flavone and flavonol biosynthesis	2	1	1	0	0	0	0	0	0	0	0	0	0	0	0	0	0	0	0	0	0	0	0	0	0	0	0	0
map00945	Stilbenoid, diarylheptanoid and gingerol biosynthesis	3	1	0.833	0	0	0	0	0	0	0	0	0	0	0	0	0.167	0	0	0	0	0	0	0	0	0	0	0	0
map00946	Degradation of flavonoids	10	4	0.665	0	0	0	0.209	0	0	0.069	0	0	0	0	0.057	0	0	0	0	0	0	0	0	0	0	0	0	0
map00950	Isoquinoline alkaloid biosynthesis	3	3	0.815	0	0	0	0	0.185	0	0	0	0	0	0	0	0	0	0	0	0	0	0	0	0	0	0	0	0
map00960	Tropane, piperidine and pyridine alkaloid biosynthesis	2	2	1	0	0	0	0	0	0	0	0	0	0	0	0	0	0	0	0	0	0	0	0	0	0	0	0	0
map00965	Betalain biosynthesis	4	2	0.398	0.602	0	0	0	0	0	0	0	0	0	0	0	0	0	0	0	0	0	0	0	0	0	0	0	0
map00966	Glucosinolate biosynthesis	5	2	0.637	0	0	0	0	0	0	0.255	0	0.109	0	0	0	0	0	0	0	0	0	0	0	0	0	0	0	0
map00970	Aminoacyl-tRNA biosynthesis	42	21	0.787	0.025	0.01	0.011	0	0.033	0	0	0	0.049	0	0	0	0.01	0	0	0	0.01	0.011	0.054	0	0	0	0	0	0
map00981	Insect hormone biosynthesis	4	3	0.712	0	0	0	0	0.144	0	0	0.144	0	0	0	0	0	0	0	0	0	0	0	0	0	0	0	0	0
map00996	Biosynthesis of various alkaloids	0	0	0	0	0	0	0	0	0	0	0	0	0	0	0	0	0	0	0	0	0	0	0	0	0	0	0	0
map00997	Biosynthesis of various other secondary metabolites	1	1	0	0	0	0	0	1	0	0	0	0	0	0	0	0	0	0	0	0	0	0	0	0	0	0	0	0
map00998	Biosynthesis of various antibiotics	11	4	0.715	0	0	0.062	0	0	0	0	0	0	0	0	0	0.046	0	0	0	0	0	0	0.177	0	0	0	0	0
map00999	Biosynthesis of various plant secondary metabolites	8	4	0.348	0	0	0	0.347	0	0	0.115	0	0	0.094	0	0.096	0	0	0	0	0	0	0	0	0	0	0	0	0
map01040	Biosynthesis of unsaturated fatty acids	10	8	0.596	0	0.049	0.048	0.15	0	0	0	0.046	0	0	0	0.111	0	0	0	0	0	0	0	0	0	0	0	0	0
map01051	Biosynthesis of ansamycins	4	3	0	0	0.15	0.154	0.15	0.418	0	0.128	0	0	0	0	0	0	0	0	0	0	0	0	0	0	0	0	0	0
map01052	Type I polyketide structures	3	2	0.354	0	0	0	0	0.494	0	0.152	0	0	0	0	0	0	0	0	0	0	0	0	0	0	0	0	0	0
map01053	Biosynthesis of siderophore group nonribosomal peptides	0	0	0	0	0	0	0	0	0	0	0	0	0	0	0	0	0	0	0	0	0	0	0	0	0	0	0	0
map01054	Nonribosomal peptide structures	0	0	0	0	0	0	0	0	0	0	0	0	0	0	0	0	0	0	0	0	0	0	0	0	0	0	0	0
map01055	Biosynthesis of vancomycin group antibiotics	4	2	0.896	0	0	0	0	0	0	0	0.104	0	0	0	0	0	0	0	0	0	0	0	0	0	0	0	0	0
map01056	Biosynthesis of type II polyketide backbone	0	0	0	0	0	0	0	0	0	0	0	0	0	0	0	0	0	0	0	0	0	0	0	0	0	0	0	0
map01057	Biosynthesis of type II polyketide products	8	4	0.879	0	0	0	0	0	0	0	0.063	0	0	0	0	0.057	0	0	0	0	0	0	0	0	0	0	0	0
map01059	Biosynthesis of enediyne antibiotics	13	3	0.784	0	0	0	0	0	0	0	0	0	0	0	0	0.216	0	0	0	0	0	0	0	0	0	0	0	0
map01100	Metabolic pathways	1608	808	0.532	0.034	0.064	0.018	0.068	0.05	0.012	0.021	0.039	0.015	0.008	0.009	0.007	0.039	0.008	0.006	0.01	0.012	0.002	0.011	0.016	0.003	0.005	0.011	0.002	0
map01110	Biosynthesis of secondary metabolites	649	324	0.496	0.042	0.051	0.024	0.063	0.059	0.016	0.025	0.033	0.018	0.01	0.008	0.007	0.059	0.015	0.005	0.008	0.011	0.002	0.015	0.011	0.004	0.004	0.01	0.002	0
map01120	Microbial metabolism in diverse environments	370	195	0.506	0.058	0.066	0.019	0.072	0.047	0.01	0.027	0.053	0.009	0.006	0.005	0	0.025	0.013	0.006	0.01	0.019	0	0.004	0.019	0.003	0	0.019	0.003	0
map01200	Carbon metabolism	167	91	0.444	0.077	0.074	0.025	0.115	0.022	0.026	0.046	0.024	0.003	0	0.003	0.003	0.006	0.029	0.008	0.007	0.032	0	0	0.01	0.003	0	0.032	0.007	0
map01210	2-Oxocarboxylic acid metabolism	58	32	0.543	0.056	0.039	0.054	0.052	0.03	0	0.042	0.009	0.052	0.018	0.009	0	0.017	0	0	0.011	0.015	0.014	0.007	0.009	0.008	0	0.015	0	0
map01212	Fatty acid metabolism	66	26	0.692	0.032	0.054	0.017	0.104	0	0	0.023	0.014	0	0	0	0.015	0	0	0	0	0.038	0	0.011	0	0	0	0	0	0
map01220	Degradation of aromatic compounds	39	11	0.542	0.034	0.1	0	0.068	0.088	0	0	0.056	0	0	0	0	0.064	0	0	0.017	0	0	0	0.033	0	0	0	0	0
map01230	Biosynthesis of amino acids	170	82	0.41	0.07	0.052	0.044	0.058	0.049	0.014	0.032	0.012	0.046	0.024	0.003	0	0.01	0.045	0.003	0.023	0.032	0.009	0.036	0.003	0.003	0	0.015	0.006	0
map01232	Nucleotide metabolism	85	36	0.472	0	0.027	0.04	0.093	0.031	0	0.025	0.043	0.023	0	0.008	0	0.113	0.008	0.008	0.02	0.031	0	0	0.011	0	0.022	0.025	0	0
map01240	Biosynthesis of cofactors	204	112	0.43	0.03	0.037	0.003	0.069	0.077	0.009	0.035	0.036	0.027	0.005	0.012	0.009	0.033	0.013	0.01	0.006	0.021	0.003	0.03	0.038	0.005	0.013	0.049	0	0
map01250	Biosynthesis of nucleotide sugars	70	35	0.615	0.012	0.011	0.007	0.118	0.055	0.017	0.007	0.022	0.016	0	0.058	0	0.044	0	0	0	0	0	0.008	0.011	0	0	0	0	0
map02010	ABC transporters	67	41	0.655	0.016	0.038	0.109	0.031	0.027	0.008	0.023	0.041	0	0.015	0	0.008	0	0.008	0	0.013	0	0	0	0.008	0	0	0	0	0
map02020	Two-component system	73	44	0.456	0.031	0.083	0.009	0.029	0.015	0.113	0.047	0.044	0	0.007	0	0.016	0.067	0.015	0.007	0	0	0	0	0.039	0	0	0.021	0	0
map02060	Phosphotransferase system (PTS)	0	0	0	0	0	0	0	0	0	0	0	0	0	0	0	0	0	0	0	0	0	0	0	0	0	0	0	0
map03008	Ribosome biogenesis in eukaryotes	49	23	0.73	0.014	0	0	0	0.035	0.045	0.012	0.023	0	0	0	0	0	0	0	0	0	0.025	0.093	0	0.025	0	0	0	0
map03010	Ribosome	62	39	0.731	0	0.04	0	0.011	0.022	0	0	0	0	0	0	0	0	0	0	0	0	0	0.062	0	0.081	0.032	0	0	0.019
map03013	Nucleocytoplasmic transport	61	16	0.912	0	0	0	0	0.038	0	0	0	0	0	0	0	0	0	0	0.042	0	0	0.008	0	0	0	0	0	0
map03015	mRNA surveillance pathway	38	14	0.812	0.027	0	0	0	0	0.04	0	0	0	0	0	0	0.014	0.014	0	0.065	0	0	0.012	0	0.016	0	0	0	0
map03018	RNA degradation	57	21	0.721	0	0	0.009	0	0	0.011	0	0	0	0	0	0	0.011	0.064	0	0.029	0.041	0.033	0	0.023	0	0	0	0	0.06
map03020	RNA polymerase	31	16	0.746	0	0	0	0	0	0	0	0	0	0	0	0	0	0	0	0	0	0.013	0.136	0	0.013	0	0	0	0.092
map03022	Basal transcription factors	9	6	0.754	0	0	0	0	0	0.067	0	0	0	0	0	0	0	0.077	0	0	0	0	0.046	0	0.055	0	0	0	0
map03030	DNA replication	40	24	0.707	0	0	0	0	0	0	0.013	0.014	0	0	0	0	0	0	0	0	0	0.045	0.149	0	0.071	0	0	0	0
map03040	Spliceosome	37	19	0.809	0	0	0	0	0.03	0	0.015	0.015	0.015	0	0	0	0	0	0	0.069	0.015	0	0	0.016	0	0.015	0	0	0
map03050	Proteasome	19	12	0.814	0	0	0	0.039	0	0	0	0	0	0	0	0	0	0	0	0	0	0	0.051	0	0.067	0	0	0	0.029
map03060	Protein export	29	16	0.615	0	0.122	0.068	0	0.028	0	0	0	0	0	0.037	0.017	0	0	0	0	0	0	0	0.114	0	0	0	0	0
map03070	Bacterial secretion system	7	4	0.287	0	0.474	0	0	0	0	0	0	0	0	0	0	0	0	0	0	0	0	0	0.238	0	0	0	0	0
map03082	ATP-dependent chromatin remodeling	12	5	0.749	0	0	0	0	0	0	0	0	0	0	0	0	0	0	0	0	0.209	0	0	0	0.042	0	0	0	0
map03083	Polycomb repressive complex	42	8	0.798	0	0	0	0	0.012	0	0.023	0.012	0	0.018	0	0	0	0	0	0.079	0.059	0	0	0	0	0	0	0	0
map03410	Base excision repair	40	16	0.654	0.017	0	0	0	0	0.028	0.076	0.016	0.035	0	0	0	0.018	0	0	0	0.014	0.036	0.107	0	0	0	0	0	0
map03420	Nucleotide excision repair	60	29	0.729	0	0	0.016	0	0.009	0.01	0	0.009	0	0.033	0	0	0	0.012	0	0	0	0.029	0.087	0	0.053	0	0	0	0.013
map03430	Mismatch repair	23	15	0.487	0.025	0	0.054	0	0	0	0.027	0.03	0	0	0	0	0	0	0.058	0	0	0.095	0.225	0	0	0	0	0	0
map03440	Homologous recombination	34	19	0.642	0	0	0	0	0	0	0.042	0.022	0	0	0	0	0	0	0	0	0	0.072	0.204	0	0.018	0	0	0	0
map03450	Non-homologous end-joining	1	1	1	0	0	0	0	0	0	0	0	0	0	0	0	0	0	0	0	0	0	0	0	0	0	0	0	0
map03460	Fanconi anemia pathway	27	13	0.682	0.078	0	0	0	0	0	0.022	0	0	0	0	0	0	0	0	0	0	0.022	0.079	0	0.117	0	0	0	0
map04010	MAPK signaling pathway	66	15	0.462	0	0	0	0	0.017	0.039	0.008	0.025	0.008	0	0	0	0.44	0	0	0	0	0	0	0	0	0	0	0	0
map04011	MAPK signaling pathway - yeast	14	9	0.524	0	0	0	0.097	0.04	0.108	0	0.117	0	0	0	0	0.074	0	0	0	0	0	0	0	0	0	0.04	0	0
map04012	ErbB signaling pathway	15	5	0.09	0	0	0	0	0	0.284	0	0.193	0	0	0	0	0.433	0	0	0	0	0	0	0	0	0	0	0	0
map04013	MAPK signaling pathway - fly	34	9	0.718	0	0	0	0	0.015	0.015	0	0.015	0	0	0	0	0.223	0	0	0.015	0	0	0	0	0	0	0	0	0
map04014	Ras signaling pathway	52	10	0.931	0	0	0	0	0	0.009	0	0	0	0	0	0	0.06	0	0	0	0	0	0	0	0	0	0	0	0
map04015	Rap1 signaling pathway	19	5	0.878	0	0	0	0	0	0	0	0	0	0	0	0	0.122	0	0	0	0	0	0	0	0	0	0	0	0
map04016	MAPK signaling pathway - plant	9	6	0.695	0	0	0	0.093	0	0	0	0	0	0	0	0	0.213	0	0	0	0	0	0	0	0	0	0	0	0
map04020	Calcium signaling pathway	16	6	0.272	0	0	0	0.285	0.047	0.257	0	0.083	0	0	0	0	0.057	0	0	0	0	0	0	0	0	0	0	0	0
map04022	cGMP-PKG signaling pathway	20	6	0.594	0	0	0	0.274	0.029	0	0	0	0	0	0	0	0.103	0	0	0	0	0	0	0	0	0	0	0	0
map04024	cAMP signaling pathway	36	13	0.618	0	0	0	0.109	0.015	0.109	0.016	0.03	0	0	0	0	0.103	0	0	0	0	0	0	0	0	0	0	0	0
map04064	NF-kappa B signaling pathway	13	4	0.261	0	0	0	0	0	0.131	0	0.131	0	0	0	0	0.477	0	0	0	0	0	0	0	0	0	0	0	0
map04066	HIF-1 signaling pathway	26	8	0.389	0	0	0.018	0.039	0	0.1	0	0.093	0	0	0	0	0.168	0.13	0	0	0.062	0	0	0	0	0	0	0	0
map04068	FoxO signaling pathway	25	6	0.085	0.077	0	0	0.043	0	0.117	0	0.083	0	0	0	0	0.526	0	0.025	0	0	0	0.044	0	0	0	0	0	0
map04070	Phosphatidylinositol signaling system	9	5	0.315	0	0	0	0	0.335	0	0.058	0	0	0	0	0.058	0	0	0	0	0	0	0	0	0	0.233	0	0	0
map04071	Sphingolipid signaling pathway	31	10	0.77	0	0	0	0.016	0	0.036	0.052	0.018	0	0	0	0.018	0.09	0	0	0	0	0	0	0	0	0	0	0	0
map04072	Phospholipase D signaling pathway	20	5	0.833	0	0	0	0.031	0	0	0	0	0	0	0	0	0.137	0	0	0	0	0	0	0	0	0	0	0	0
map04075	Plant hormone signal transduction	1	1	0	0	0	0	0	0	0	0	0	0	0	1	0	0	0	0	0	0	0	0	0	0	0	0	0	0
map04120	Ubiquitin mediated proteolysis	86	34	0.9	0	0	0	0	0.005	0	0	0	0	0.024	0	0	0	0	0.018	0.042	0	0	0	0.01	0	0	0	0	0
map04122	Sulfur relay system	14	8	0.62	0.04	0	0	0	0.18	0.037	0	0	0	0	0	0	0	0	0	0.04	0.038	0	0	0.044	0	0	0	0	0
map04130	SNARE interactions in vesicular transport	0	0	0	0	0	0	0	0	0	0	0	0	0	0	0	0	0	0	0	0	0	0	0	0	0	0	0	0
map04141	Protein processing in endoplasmic reticulum	56	27	0.81	0	0.008	0	0	0.029	0.017	0.035	0	0.009	0	0.015	0	0	0.034	0	0.009	0	0	0	0.026	0.008	0	0	0	0
map04150	mTOR signaling pathway	54	19	0.537	0	0	0	0	0.02	0.101	0	0.076	0	0	0.011	0	0.224	0	0	0.021	0	0	0	0.009	0	0	0	0	0
map04151	PI3K-Akt signaling pathway	52	14	0.468	0	0	0	0	0	0.137	0	0.086	0	0	0	0	0.297	0	0	0.011	0	0	0	0	0	0	0	0	0
map04152	AMPK signaling pathway	70	17	0.398	0.024	0	0.007	0	0	0.125	0.008	0.072	0	0	0	0.017	0.248	0.053	0.008	0	0.025	0	0.014	0	0	0	0	0	0
map04310	Wnt signaling pathway	31	10	0.534	0	0	0	0	0.017	0.066	0	0.052	0	0	0	0	0.244	0	0	0.052	0	0	0.035	0	0	0	0	0	0
map04330	Notch signaling pathway	7	3	0.364	0	0	0	0	0	0	0	0	0	0	0	0	0	0	0	0	0.454	0	0.182	0	0	0	0	0	0
map04340	Hedgehog signaling pathway	10	4	0.273	0.078	0	0	0	0	0.196	0	0.074	0	0	0	0	0	0	0.242	0.137	0	0	0	0	0	0	0	0	0
map04341	Hedgehog signaling pathway - fly	10	4	0.482	0.069	0	0	0	0	0.048	0	0.066	0	0	0	0	0	0	0.213	0.121	0	0	0	0	0	0	0	0	0
map04350	TGF-beta signaling pathway	26	7	0.536	0	0	0	0	0	0.147	0	0.096	0	0	0	0	0.109	0	0	0	0.111	0	0	0	0	0	0	0	0
map04370	VEGF signaling pathway	10	3	0.664	0	0	0	0.061	0	0	0	0	0	0	0	0	0.275	0	0	0	0	0	0	0	0	0	0	0	0
map04371	Apelin signaling pathway	41	8	0.112	0.047	0	0	0.015	0	0.254	0	0.155	0	0	0	0	0.375	0	0.015	0	0	0	0.027	0	0	0	0	0	0
map04390	Hippo signaling pathway	20	7	0.808	0	0	0	0	0	0.118	0	0	0	0	0	0	0.025	0	0	0.049	0	0	0	0	0	0	0	0	0
map04391	Hippo signaling pathway - fly	10	3	0.859	0	0	0	0	0	0.093	0	0	0	0	0	0	0.048	0	0	0	0	0	0	0	0	0	0	0	0
map04392	Hippo signaling pathway - multiple species	1	1	0	0	0	0	0	0	0.319	0	0	0	0	0	0	0.681	0	0	0	0	0	0	0	0	0	0	0	0
map04630	JAK-STAT signaling pathway	1	1	1	0	0	0	0	0	0	0	0	0	0	0	0	0	0	0	0	0	0	0	0	0	0	0	0	0
map04668	TNF signaling pathway	13	4	0.152	0	0	0	0	0	0.053	0	0.053	0	0	0	0	0.741	0	0	0	0	0	0	0	0	0	0	0	0
